# Supplementary material
Source: publisher site journal article supplement (https://www.dovepress.com/get_supplementary_file.php?f=281198-1.xlsx)
Supplement: Supplementary file 1 [file get_supplementary_file.php]

## Sheet: Table S1
Dataset 1. Total peaks identified in GC-MS
	Analyte	Similarity	R.T...minutes.	Count		QC_1				QC_2				QC_4				QC_5				QC_6				QC_7				QC_8				QC_9				X29_1				X60_1				X28_1
Peak	NA	NA	Average	NA	Mass	Class	R.T. (minutes)	NA	Area	Class	R.T. (minutes)	NA	Area	Class	R.T. (minutes)	NA	Area	Class	R.T. (minutes)	NA	Area	Class	R.T. (minutes)	NA	Area	Class	R.T. (minutes)	NA	Area	Class	R.T. (minutes)	NA	Area	Class	R.T. (minutes)	NA	Area	Class	R.T. (minutes)	NA	Area	Class	R.T. (minutes)	NA	Area	Class	R.T. (minutes)	NA	Area
Analyte 4	4	0	6.1792,0	51	281			0		Class1	6.18333,0	0	29670.6	Class1	6.17833,0	0	29045.3	Class1	6.215,0	0	25289	Class1	6.195,0	0	23287.8	Class1	6.235,0	0	27316.6			0		Class1	6.2125,0	0	26662.8	Class2	6.1575,0	0	23520			0		Class2	6.17833,0	0	32920.5
Analyte 8	8	437	6.30335,0	56	207	Class1	6.36583,0	0	147920	Class1	6.30333,0	0	20041.5	Class1	6.34917,0	0	56571.4	Class1	6.38583,0	0	50217.4	Class1	6.425,0	437	4146.12	Class1	6.2925,0	0	15116.3	Class1	6.27667,0	0	974.496	Class1	6.34417,0	0	92709.8	Class2	6.29333,0	0	175300	Class2	6.2925,0	0	81506	Class2	6.25833,0	0	587.646
Analyte 10	10	402	6.36195,0	64	160	Class1	6.42083,0	0	126291	Class1	6.39417,0	0	119219	Class1	6.38333,0	0	75921.3	Class1	6.43583,0	0	107932			0				0				0		Class1	6.4475,0	0	155507	Class2	6.3425,0	0	256431	Class2	6.335,0	0	830321	Class2	6.3575,0	0	358865
Analyte 13	12	0	6.48019,0	69	174	Class1	6.51667,0	0	2.69673e+06	Class1	6.50833,0	0	730340	Class1	6.48,0	0	1.39447e+06	Class1	6.53,0	0	2.17567e+06	Class1	6.50333,0	0	2.66359e+06	Class1	6.54583,0	0	2.31742e+06	Class1	6.40583,0	0	986219	Class1	6.5575,0	0	602077	Class2	6.4725,0	0	1.1342e+07	Class2	6.46583,0	0	2.2544e+06	Class2	6.47833,0	0	4.33307e+06
Analyte 17	15	0	6.5615,0	69	207	Class1	6.58833,0	0	770337	Class1	6.57417,0	0	762919	Class1	6.56667,0	0	586837	Class1	6.59667,0	0	612071	Class1	6.58417,0	0	493344	Class1	6.615,0	0	493091	Class1	6.50333,0	0	284057	Class1	6.605,0	0	662789	Class2	6.54917,0	0	1.11084e+06	Class2	6.55667,0	0	708491	Class2	6.56083,0	0	509788
Analyte 19	17	421.267	7.29389,0	42	117	Class1	6.67083,0	300	224715	Class1	6.65417,0	0	177559	Class1	6.6525,0	0	165694	Class1	6.6825,0	0	183072	Class1	6.66167,0	335	149120			0		Class1	6.58833,0	323	86573.4			0				0		Class2	6.64417,0	520	324978			0
Analyte 20	18	234.588	6.65019,0	69	152	Class1	6.68583,0	0	5.76425e+06	Class1	6.66833,0	0	5.01368e+06	Class1	6.66167,0	0	4.27065e+06	Class1	6.69917,0	0	4.47986e+06	Class1	6.68167,0	244	4.48696e+06	Class1	6.7175,0	0	4.34135e+06	Class1	6.59583,0	0	2.93878e+06	Class1	6.70667,0	208	6.553e+06	Class2	6.63417,0	388	8.323e+06	Class2	6.64917,0	251	4.56697e+06	Class2	6.6475,0	0	4375623
Analyte 21	19	0	6.71415,0	66	318	Class1	6.75167,0	0	162674	Class1	6.73417,0	0	181645	Class1	6.7275,0	0	161729	Class1	6.76167,0	0	132400	Class1	6.74667,0	0	128972	Class1	6.78083,0	0	143246	Class1	6.65583,0	0	80540.1	Class1	6.77167,0	0	202889	Class2	6.6975,0	0	62414.1	Class2	6.72333,0	0	43897.8	Class2	6.70667,0	0	103787
unknown	21	241.6	6.72617,0	65	157	Class1	6.77167,0	188	70673.1	Class1	6.75167,0	280	64584.1	Class1	6.745,0	198	46726.7	Class1	6.7825,0	0	35544.4	Class1	6.76583,0	0	27652.8	Class1	6.80167,0	0	28265.7			0		Class1	6.79167,0	307	26035.7	Class2	6.70583,0	250	160592			0		Class2	6.72333,0	247	31985.3
hydroxylamine	24	379	6.81676,0	9	102	Class1	6.82583,0	322	215641	Class1	6.81,0	372	247568	Class1	6.80167,0	0	180812	Class1	6.8325,0	367	157971	Class1	6.82,0	330	148151	Class1	6.84583,0	469	144104			0		Class1	6.83667,0	420	140437	Class2	6.7875,0	388	618793			0				0
Analyte 31	27	285	6.8128,0	69	207	Class1	6.84,0	0	2.86663e+06	Class1	6.82417,0	0	2.55811e+06	Class1	6.8175,0	0	2.48296e+06	Class1	6.84917,0	0	2.64757e+06	Class1	6.83583,0	0	2.5218e+06	Class1	6.86667,0	0	2.4443e+06	Class1	6.76167,0	0	1.6199e+06	Class1	6.85917,0	0	2.86253e+06	Class2	6.8025,0	0	4.85584e+06	Class2	6.80583,0	0	1.35768e+06	Class2	6.8125,0	0	2.22312e+06
2-keto-isovaleric acid 1	30	360.114	6.86122,0	69	174	Class1	6.90833,0	0	561480	Class1	6.895,0	0	461595	Class1	6.89167,0	0	386394	Class1	6.91417,0	0	377968	Class1	6.90417,0	0	356087	Class1	6.92583,0	0	383963	Class1	6.8425,0	289	206809	Class1	6.92333,0	0	438606	Class2	6.8275,0	423	1.07567e+06	Class2	6.8475,0	346	215758	Class2	6.85667,0	371	241722
unknown	31	727.833	6.94215,0	52	131	Class1	6.9175,0	477	34223.9	Class1	6.905,0	507	33033.8	Class1	6.90417,0	531	47284.1	Class1	6.92417,0	465	24115.1	Class1	6.915,0	473	31314.9	Class1	6.93667,0	400	36932.3			0		Class1	6.9275,0	484	33084.2			0				0				0
Analyte 36	32	390	6.93754,0	58	151	Class1	6.93333,0	0	2.1758e+06	Class1	6.9625,0	0	4.63576e+06	Class1	6.96,0	0	4.06242e+06			0		Class1	6.98167,0	411	2.45625e+06	Class1	6.96417,0	0	2.30162e+06			0		Class1	6.95417,0	0	2.55931e+06			0				0		Class2	6.935,0	0	3.54455e+06
unknown	34	516.6	6.93514,0	69	117	Class1	6.9775,0	525	5.61478e+06	Class1	6.96,0	525	5.34596e+06	Class1	6.9525,0	522	4.75458e+06	Class1	6.98833,0	623	5.46963e+06	Class1	6.9725,0	474	4.83958e+06	Class1	7.00583,0	612	4.45687e+06	Class1	6.88,0	0	2.46263e+06	Class1	6.99667,0	482	5.4452e+06	Class2	6.92167,0	0	6.94382e+06	Class2	6.9175,0	0	1.57092e+06	Class2	6.9325,0	501	1.62512e+06
2-hydroxybutanoic acid	35	844.625	6.98317,0	41	205	Class1	7.0175,0	881	138046	Class1	7,0	844	120407	Class1	6.99167,0	879	89987	Class1	7.0275,0	885	105664	Class1	7.01167,0	906	138503	Class1	7.04583,0	879	142290	Class1	6.91667,0	939	75689.3	Class1	7.03667,0	922	113966	Class2	6.96167,0	945	194295	Class2	6.95583,0	948	35736.4	Class2	6.97167,0	831	169785
Analyte 40	36	444.571	7.02052,0	69	221	Class1	7.05917,0	0	577533	Class1	7.0425,0	0	800016	Class1	7.03417,0	0	676759	Class1	7.06917,0	0	517217	Class1	7.05417,0	0	827462	Class1	7.08583,0	0	501654	Class1	6.95833,0	0	496541	Class1	7.07667,0	0	621608	Class2	7.00833,0	0	911179	Class2	7.00417,0	0	197290	Class2	7.0175,0	0	415404
unknown	37	721.324	7.04827,0	69	190	Class1	7.10583,0	730	167423	Class1	7.08417,0	750	127165	Class1	7.08417,0	760	98202.5	Class1	7.105,0	750	115913	Class1	7.0875,0	666	215225	Class1	7.11917,0	662	148263	Class1	7.02833,0	646	55318.3	Class1	7.11583,0	687	126364	Class2	7.02583,0	721	750575	Class2	7.02917,0	628	203775	Class2	7.03333,0	724	640999
oxalic acid	43	807.015	7.32587,0	69	147	Class1	7.36083,0	640	3.73518e+06	Class1	7.34667,0	644	2.9287e+06	Class1	7.34083,0	842	2.28054e+06	Class1	7.36917,0	629	2.60286e+06	Class1	7.35667,0	637	2.49774e+06	Class1	7.38417,0	635	2.20129e+06	Class1	7.28167,0	837	1.21657e+06	Class1	7.37583,0	637	2.13176e+06	Class2	7.315,0	819	1.08298e+06	Class2	7.31167,0	834	1.43318e+06	Class2	7.32167,0	838	2.14369e+06
unknown	47	290.333	7.36664,0	65	225	Class1	7.47667,0	0	250702	Class1	7.44083,0	0	218981	Class1	7.43667,0	0	174091	Class1	7.50667,0	0	215205	Class1	7.48583,0	0	259864	Class1	7.54083,0	0	308300	Class1	7.31417,0	0	150976	Class1	7.53167,0	0	375493	Class2	7.35167,0	0	258930	Class2	7.25583,0	0	262295	Class2	7.4175,0	0	419422
3-Hydroxypropionic acid 1	49	466.642	7.53914,0	69	116	Class1	7.5725,0	476	7.42723e+06	Class1	7.55917,0	472	5.8126e+06	Class1	7.55417,0	453	4.43424e+06	Class1	7.57833,0	481	8.09119e+06	Class1	7.56667,0	450	6.52762e+06	Class1	7.59167,0	446	7.33843e+06	Class1	7.50333,0	380	892521	Class1	7.58417,0	408	5.85117e+06	Class2	7.53083,0	461	3.01641e+07	Class2	7.525,0	472	6.79193e+06	Class2	7.53583,0	467	5.1214e+06
unknown	52	404	7.68038,0	66	146	Class1	7.70667,0	389	435810	Class1	7.70083,0	414	337303	Class1	7.68583,0	0	261745			0		Class1	7.6975,0	470	334500	Class1	7.71583,0	0	324920	Class1	7.63833,0	0	136565	Class1	7.715,0	0	116028	Class2	7.67417,0	0	259208	Class2	7.67583,0	388	232652	Class2	7.68167,0	0	146852
Analyte 65	54	0	7.73257,0	48	207	Class1	7.76333,0	0	11332.7	Class1	7.7525,0	0	12511.2	Class1	7.7475,0	0	12794	Class1	7.76667,0	0	8651	Class1	7.76,0	0	8553.7	Class1	7.77833,0	0	11016.9			0		Class1	7.77167,0	0	17053.8			0				0				0
3-hydroxybutyric acid	55	397.341	7.74428,0	69	116	Class1	7.775,0	369	1.11506e+06	Class1	7.76083,0	0	1.27618e+06	Class1	7.75833,0	404	766969	Class1	7.78167,0	0	917830	Class1	7.77,0	374	860011	Class1	7.79167,0	425	1.03527e+06	Class1	7.7075,0	0	527003	Class1	7.785,0	0	971874	Class2	7.73667,0	0	773768	Class2	7.7325,0	397	1.41212e+06	Class2	7.74167,0	409	1.6947e+06
Analyte 69	57	250.136	7.70199,0	44	151	Class1	7.82333,0	0	152849	Class1	7.78917,0	207	149050	Class1	7.7875,0	254	113630			0		Class1	7.835,0	0	92596.2			0		Class1	7.69583,0	0	43563.8			0		Class2	7.70667,0	0	230906	Class2	7.62417,0	368	187236			0
Analyte 72	59	0	7.8236,0	69	245	Class1	7.85083,0	0	946234	Class1	7.84083,0	0	818755	Class1	7.83583,0	0	669568	Class1	7.85583,0	0	860541	Class1	7.84667,0	0	950966	Class1	7.865,0	0	1.12925e+06	Class1	7.79333,0	0	552680	Class1	7.85833,0	0	1.4115e+06	Class2	7.8175,0	0	4.47236e+06	Class2	7.81333,0	0	336225	Class2	7.82083,0	0	812707
unknown	62	576.314	7.86272,0	54	131	Class1	7.89083,0	670	131770	Class1	7.88,0	489	105088	Class1	7.875,0	630	82196.4	Class1	7.895,0	626	95263.4	Class1	7.885,0	575	101371	Class1	7.905,0	463	112280	Class1	7.835,0	580	74161.9	Class1	7.89833,0	677	120691	Class2	7.85333,0	703	134816			0		Class2	7.8575,0	560	105285
sulfuric acid	68	789.609	7.96205,0	24	147	Class1	7.9925,0	645	552326	Class1	7.98083,0	789	523531	Class1	7.9775,0	791	520187	Class1	7.9925,0	746	641275	Class1	7.985,0	768	579023	Class1	8,0	830	713719			0		Class1	8.00083,0	796	526022	Class2	7.96083,0	675	1.04843e+06			0				0
Analyte 84	70	292.875	7.94645,0	35	267			0				0				0		Class1	8.0125,0	190	49739.3	Class1	8.00417,0	209	157672	Class1	8.0225,0	0	147645	Class1	7.9525,0	355	120563	Class1	8.01583,0	0	248206	Class2	7.9275,0	0	8749.68			0		Class2	7.93083,0	0	28367.7
N-Methyl-DL-alanine	71	484.985	7.97954,0	69	130	Class1	8.0225,0	502	155290	Class1	8.0125,0	476	124802	Class1	8.01,0	476	93103.5	Class1	8.025,0	499	127409	Class1	8.01583,0	14	129290	Class1	8.02917,0	0	161199	Class1	7.97917,0	412	64359.5	Class1	8.02833,0	528	180662	Class2	7.97083,0	472	2.39186e+06	Class2	7.96417,0	520	3.40386e+06	Class2	7.9725,0	475	4.42882e+06
unknown	76	163	8.13711,0	57	267			0				0		Class1	8.15167,0	0	9311.07			0		Class1	8.1575,0	0	17175.5			0		Class1	8.1125,0	0	17157	Class1	8.16917,0	0	17153.1	Class2	8.13833,0	0	20786.8	Class2	8.135,0	0	41628.7	Class2	8.13917,0	0	32190.7
Lactamide 1	77	485.867	8.18238,0	61	104	Class1	8.20667,0	502	376584	Class1	8.19667,0	562	453246	Class1	8.19417,0	453	409883	Class1	8.21,0	564	340964			0		Class1	8.21833,0	468	318504	Class1	8.16083,0	455	130182	Class1	8.21333,0	518	374284	Class2	8.17667,0	535	1.25605e+06	Class2	8.175,0	539	353803	Class2	8.18,0	567	209909
2-amino-2-methylpropane-1,3-diol 2	78	214.1	8.22017,0	49	206			0		Class1	8.23,0	0	10411.6	Class1	8.2275,0	0	19203.3	Class1	8.24583,0	0	12724.9	Class1	8.2375,0	0	8989.35	Class1	8.25167,0	0	17089.9			0		Class1	8.2475,0	0	29501.8	Class2	8.21667,0	213	67851.3			0				0
Analyte 102	80	264.833	8.25591,0	65	115			0		Class1	8.26917,0	284	27492.3			0		Class1	8.2825,0	254	28896.6	Class1	8.27417,0	0	26035.7	Class1	8.28917,0	240	32046.7			0				0		Class2	8.25333,0	257	115445	Class2	8.25083,0	225	40414.1	Class2	8.255,0	293	50151.3
Analyte 105	83	255	8.34073,0	64	165	Class1	8.34417,0	0	9.56167e+06	Class1	8.34083,0	0	8.10404e+06	Class1	8.3425,0	0	6.87504e+06	Class1	8.34667,0	0	8.46192e+06	Class1	8.34167,0	0	8.16674e+06	Class1	8.35083,0	0	8.28039e+06	Class1	8.32583,0	0	3.95513e+06	Class1	8.34833,0	0	9.17889e+06	Class2	8.32083,0	0	1.0518e+07	Class2	8.32167,0	0	9.56099e+06	Class2	8.3475,0	0	3.75009e+06
Analyte 108	84	0	8.34504,0	38	147	Class1	8.36417,0	0	6.39333e+06	Class1	8.35583,0	0	5.2708e+06	Class1	8.35333,0	0	4.32006e+06	Class1	8.36667,0	0	5.19081e+06	Class1	8.35917,0	0	4.75287e+06	Class1	8.37417,0	0	4.78973e+06	Class1	8.32,0	0	2.2164e+06	Class1	8.36917,0	0	5.26112e+06	Class2	8.3375,0	0	1.26729e+07	Class2	8.33417,0	0	2.87225e+06	Class2	8.34,0	0	3.90329e+06
Analyte 116	90	0	8.42036,0	69	281	Class1	8.44083,0	0	1.37956e+06	Class1	8.43333,0	0	1.16317e+06	Class1	8.43,0	0	977315	Class1	8.44417,0	0	1.16081e+06	Class1	8.4375,0	0	1.12813e+06	Class1	8.45167,0	0	1.12709e+06	Class1	8.39667,0	0	591957	Class1	8.44583,0	0	1.24475e+06	Class2	8.41833,0	0	1.14191e+06	Class2	8.41417,0	0	803031	Class2	8.41917,0	0	1.68875e+06
Analyte 119	92	272.682	8.48161,0	58	220	Class1	8.50333,0	0	17003.1	Class1	8.49417,0	248	12272.3	Class1	8.49417,0	467	10517.1	Class1	8.50417,0	225	16911.2	Class1	8.49667,0	393	12218.6	Class1	8.51333,0	535	15256.2	Class1	8.45917,0	200	8242.27	Class1	8.50667,0	0	13218.8	Class2	8.47583,0	0	32936.7			0				0
Analyte 123	94	151.5	8.51695,0	62	84	Class1	8.54917,0	75	584730	Class1	8.53167,0	75	672242	Class1	8.53417,0	75	497626	Class1	8.53833,0	261	617405	Class1	8.53,0	802	757334	Class1	8.54417,0	169	557127	Class1	8.51917,0	225	286156	Class1	8.54167,0	75	713400	Class2	8.50833,0	301	318077	Class2	8.51667,0	216	257432	Class2	8.51917,0	0	131566
Analyte 126	96	344.429	8.61551,0	69	221	Class1	8.6325,0	0	40088.7	Class1	8.62917,0	0	26791.5	Class1	8.62667,0	197	16856.8	Class1	8.63667,0	299	34550.7	Class1	8.63083,0	365	30784.3	Class1	8.64167,0	0	38130.6	Class1	8.60083,0	0	14799.5	Class1	8.63833,0	336	39325.1	Class2	8.61333,0	320	62528.9	Class2	8.61,0	0	134354	Class2	8.615,0	0	131460
Analyte 128	97	0	8.61881,0	53	267			0				0		Class1	8.65417,0	0	10745.4	Class1	8.66333,0	0	7164.33	Class1	8.66,0	0	8512.01			0		Class1	8.57583,0	0	5719.28	Class1	8.61417,0	0	9667.1			0				0				0
unknown	102	223.222	8.82382,0	19	210	Class1	8.84,0	123	25781.7	Class1	8.83,0	228	12929.1	Class1	8.83083,0	196	12215.5			0		Class1	8.8325,0	291	14641.1			0		Class1	8.80917,0	0	11182.3	Class1	8.84083,0	221	18322.4	Class2	8.8125,0	0	17056.8	Class2	8.82,0	0	21165.9			0
Analyte 138	105	374.667	8.8613,0	9	117	Class1	8.8675,0	383	453805	Class1	8.86083,0	0	371732	Class1	8.85917,0	319	292758	Class1	8.86917,0	0	329410	Class1	8.86333,0	422	305516	Class1	8.87417,0	0	302869	Class1	8.835,0	0	150523	Class1	8.87,0	0	334447			0				0				0
malonic acid 1	106	566.304	8.85469,0	64	147	Class1	8.87333,0	580	2.34629e+06	Class1	8.86667,0	587	1911402	Class1	8.865,0	646	1.45633e+06	Class1	8.875,0	586	1.67543e+06	Class1	8.86917,0	631	1.54692e+06	Class1	8.88,0	593	1.48414e+06	Class1	8.84167,0	622	805017	Class1	8.87583,0	596	1.71194e+06	Class2	8.85,0	616	2.2378e+06			0		Class2	8.85167,0	563	994046
Methylmalonic acid	109	478.848	8.97355,0	68	281	Class1	8.98917,0	545	78201.3	Class1	8.985,0	516	80542.2	Class1	8.98167,0	491	65489.5	Class1	8.99,0	470	71822.7	Class1	8.985,0	448	69678.2	Class1	8.995,0	480	77187.9	Class1	8.9575,0	496	46308.9	Class1	8.99083,0	508	82103.5	Class2	8.975,0	504	132980	Class2	8.96667,0	567	71614.3	Class2	8.9725,0	478	89712.9
2-Hydroxyvaleric acid	113	748.147	9.03469,0	69	131	Class1	9.05167,0	756	2.60866e+06	Class1	9.04583,0	755	2.14588e+06	Class1	9.04417,0	761	1.69245e+06	Class1	9.05333,0	777	1.91197e+06	Class1	9.04833,0	759	1.68604e+06	Class1	9.0575,0	762	1.82922e+06	Class1	9.01917,0	769	896263	Class1	9.05417,0	764	2.01114e+06	Class2	9.03417,0	729	6.79341e+06	Class2	9.03083,0	626	934947	Class2	9.03333,0	759	1.44678e+06
valine	116	906.397	9.11453,0	69	144	Class1	9.13167,0	917	1.20787e+06	Class1	9.12583,0	875	953055	Class1	9.12417,0	852	719822	Class1	9.13333,0	885	907277	Class1	9.12833,0	902	692467	Class1	9.1375,0	812	702863	Class1	9.10167,0	888	263969	Class1	9.13417,0	871	656922	Class2	9.1125,0	894	2.22902e+06	Class2	9.11167,0	909	958268	Class2	9.11417,0	924	768093
Analyte 159	118	474.316	9.21942,0	66	281	Class1	9.20833,0	0	10086.7	Class1	9.2025,0	439	10115.9			0		Class1	9.235,0	0	68033.7	Class1	9.23167,0	0	72134.2	Class1	9.23833,0	0	66331.2	Class1	9.20917,0	459	53179.2	Class1	9.23583,0	0	65878.7	Class2	9.21917,0	0	108138	Class2	9.22,0	0	80696.9	Class2	9.22,0	0	83571.2
Analyte 164	122	570.667	9.2975,0	64	55	Class1	9.31417,0	0	287480	Class1	9.30917,0	0	232102	Class1	9.3075,0	0	198899	Class1	9.31417,0	0	203624	Class1	9.31,0	0	198757	Class1	9.31667,0	0	195679	Class1	9.29,0	0	91683.9	Class1	9.31417,0	0	213319	Class2	9.29583,0	0	497028	Class2	9.29833,0	0	137855	Class2	9.29833,0	0	183739
4-hydroxybutyrate	123	641.52	9.4047,0	28	277	Class1	9.375,0	556	1025.01			0				0				0				0		Class1	9.37417,0	0	215.325	Class1	9.39083,0	515	5899.44	Class1	9.37167,0	0	100.876			0				0		Class2	9.42833,0	847	583.972
guaiacol	129	786.82	9.49232,0	51	166	Class1	9.46667,0	931	227775	Class1	9.47167,0	780	194384	Class1	9.48167,0	934	150737	Class1	9.465,0	653	190071	Class1	9.465,0	839	160998	Class1	9.46583,0	613	188405	Class1	9.5175,0	885	91491.6	Class1	9.4575,0	827	205821	Class2	9.505,0	653	81206.8			0				0
Analyte 178	132	362.5	9.58889,0	15	179			0				0				0		Class1	9.58333,0	0	58948	Class1	9.58583,0	0	54262.7	Class1	9.57667,0	0	58409.7			0		Class1	9.57917,0	0	62463.9	Class2	9.6025,0	0	256572			0				0
Analyte 181	134	301.895	9.59885,0	50	231	Class1	9.61417,0	0	38418.8			0		Class1	9.60833,0	0	22496.1	Class1	9.61583,0	0	31533.3	Class1	9.6125,0	268	24610.6	Class1	9.62,0	250	33010.8	Class1	9.585,0	0	16668.3	Class1	9.615,0	330	29149.6	Class2	9.5975,0	0	25776.7	Class2	9.5975,0	382	29606.4			0
Analyte 192	143	275.464	9.78729,0	67	231	Class1	9.79833,0	285	395183	Class1	9.795,0	0	443122	Class1	9.79417,0	0	352208	Class1	9.79833,0	0	313270	Class1	9.795,0	0	249326	Class1	9.79917,0	360	294046	Class1	9.77833,0	225	145528	Class1	9.79667,0	439	325937	Class2	9.78917,0	0	475508	Class2	9.78583,0	0	188186	Class2	9.7875,0	269	278504
unknown	145	379.371	9.81953,0	67	174	Class1	9.83167,0	371	2.81027e+07	Class1	9.82667,0	380	2.44609e+07	Class1	9.82417,0	389	22074530	Class1	9.825,0	378	2.69952e+07	Class1	9.82833,0	380	2.46854e+07	Class1	9.83583,0	379	2.58288e+07	Class1	9.80333,0	369	8.78943e+06	Class1	9.83167,0	350	2.67249e+07	Class2	9.82417,0	359	3.94588e+07	Class2	9.81417,0	374	1.74188e+07	Class2	9.81833,0	368	2.22413e+07
leucine	149	699.188	9.88965,0	33	158	Class1	9.89833,0	801	1.03062e+06	Class1	9.89667,0	756	772373	Class1	9.905,0	695	533495	Class1	9.90583,0	728	956335	Class1	9.90083,0	756	722870	Class1	9.89917,0	826	819624	Class1	9.87833,0	212	122159	Class1	9.8975,0	751	675064			0				0		Class2	9.88833,0	559	718093
phosphate	154	858.7	9.92704,0	20	218	Class1	9.93,0	906	392622	Class1	9.92083,0	905	302376	Class1	9.96,0	908	24372.5	Class1	9.92667,0	913	380595	Class1	9.92167,0	777	341676			0		Class1	9.90667,0	917	211497	Class1	9.9375,0	922	406818	Class2	9.90917,0	766	479861	Class2	9.9525,0	955	25699.1	Class2	9.945,0	941	73476
Analyte 215	161	0	10.0715,0	29	319	Class1	10.1025,0	0	28017.4	Class1	10.0933,0	0	29018.1	Class1	10.0908,0	0	32197.7			0				0				0		Class1	10.0483,0	0	60537			0		Class2	10.0617,0	0	338474			0				0
Isoleucine	169	771.621	10.2133,0	60	158	Class1	10.2383,0	761	312975	Class1	10.2308,0	793	260650	Class1	10.2275,0	727	68795	Class1	10.2425,0	784	228766			0		Class1	10.2233,0	523	387967	Class1	10.1975,0	714	87410.5			0		Class2	10.1642,0	0	176140	Class2	10.1917,0	795	322431	Class2	10.2183,0	824	369569
Glycine-d5	178	381.889	10.388,0	58	174			0		Class1	10.4,0	404	5.3501e+07	Class1	10.3967,0	408	48741747			0		Class1	10.405,0	387	6.07528e+07			0		Class1	10.3683,0	354	4.6568e+07			0				0		Class2	10.3675,0	348	28032338	Class2	10.3825,0	394	3.45192e+07
(-)-Dihydrocarveol	179	229.667	10.3941,0	19	32	Class1	10.4175,0	377	380115	Class1	10.4175,0	72	1.27673e+06	Class1	10.4617,0	145	628643			0		Class1	10.3775,0	0	277055			0				0				0				0				0				0
succinic acid	188	852.184	10.497,0	38	147	Class1	10.5075,0	879	6.48602e+06	Class1	10.5058,0	954	2.33829e+06	Class1	10.5075,0	942	2.55569e+06	Class1	10.5067,0	777	4.04532e+06			0		Class1	10.5083,0	797	2397208			0		Class1	10.5075,0	788	2.4762e+06	Class2	10.5025,0	733	25493162	Class2	10.4933,0	931	1.82469e+06	Class2	10.4908,0	947	2.52744e+07
glycine 2	189	353.5	10.5047,0	35	240	Class1	10.5125,0	351	58802.3			0				0		Class1	10.515,0	0	103932	Class1	10.51,0	0	196900	Class1	10.5175,0	190	111196			0		Class1	10.5158,0	855	118452			0		Class2	10.5008,0	0	96431.8	Class2	10.5008,0	363	353603
2,3-Dihydroxypyridine	192	294.032	10.5357,0	66	254	Class1	10.5492,0	338	210330	Class1	10.5433,0	409	97254.1	Class1	10.5425,0	424	125393	Class1	10.55,0	370	152046	Class1	10.5467,0	402	220610	Class1	10.555,0	379	122852	Class1	10.5225,0	218	185972	Class1	10.5533,0	290	114196	Class2	10.5342,0	307	568839	Class2	10.5292,0	74	62197.9	Class2	10.5358,0	322	277310
Bis(2-hydroxypropyl)amine 1	196	249.161	10.5932,0	65	210	Class1	10.635,0	0	125011			0		Class1	10.6333,0	133	81007	Class1	10.6183,0	269	157928	Class1	10.6183,0	134	171138	Class1	10.6133,0	292	102765			0		Class1	10.6192,0	160	137854	Class2	10.5992,0	239	5.96468e+06	Class2	10.5883,0	166	708527	Class2	10.5825,0	306	6.51327e+06
unknown	198	654.551	10.6427,0	50	55			0				0				0		Class1	10.6542,0	709	251685	Class1	10.6492,0	682	199416	Class1	10.6542,0	729	118384			0		Class1	10.6533,0	521	131010			0		Class2	10.6408,0	677	235030	Class2	10.6392,0	635	918438
D-Glyceric acid	200	908.016	10.6694,0	65	189	Class1	10.68,0	946	758798	Class1	10.6758,0	932	225031	Class1	10.6742,0	947	393691	Class1	10.68,0	946	544192	Class1	10.6758,0	948	202634	Class1	10.6817,0	939	268882	Class1	10.6592,0	950	625508	Class1	10.68,0	950	301894	Class2	10.6758,0	584	2.69052e+06	Class2	10.6625,0	936	199043	Class2	10.6667,0	961	4.54148e+06
oxamide	202	697.444	10.7316,0	27	102	Class1	10.745,0	736	256734			0		Class1	10.7417,0	595	71511.7	Class1	10.74,0	839	194372	Class1	10.7392,0	647	57761.6			0				0				0				0				0		Class2	10.7267,0	718	1.17104e+06
2,2-Dimethylsuccinic Acid	205	581.74	10.74,0	50	147	Class1	10.7483,0	626	428488	Class1	10.7467,0	575	193482	Class1	10.7475,0	581	134517	Class1	10.7475,0	624	310128	Class1	10.7458,0	588	156015			0				0		Class1	10.7433,0	562	186740			0		Class2	10.7417,0	595	162256	Class2	10.7367,0	595	2.76666e+06
uracil	209	879.569	10.8313,0	66	99	Class1	10.8375,0	925	2.57756e+06	Class1	10.8392,0	862	2.43786e+06			0		Class1	10.84,0	871	1.64663e+06	Class1	10.8367,0	815	1.00727e+06	Class1	10.8375,0	948	1.49194e+06	Class1	10.835,0	868	1.43768e+06	Class1	10.8425,0	941	3.1995e+06	Class2	10.84,0	557	7.95703e+06	Class2	10.8358,0	852	486881	Class2	10.825,0	949	1.09604e+07
unknown	210	524.746	10.8366,0	68	117	Class1	10.8467,0	508	4.29474e+06	Class1	10.8433,0	546	3.85969e+06	Class1	10.8417,0	594	1.01465e+06	Class1	10.8458,0	517	3.02072e+06	Class1	10.8425,0	496	1.63028e+06	Class1	10.8483,0	452	2.81812e+06	Class1	10.8267,0	534	1.70525e+06	Class1	10.8458,0	539	5.16784e+06	Class2	10.8458,0	386	13076019	Class2	10.83,0	562	2.13185e+06	Class2	10.8333,0	556	1.21668e+07
Allylmalonic acid	212	646.881	10.8761,0	60	215	Class1	10.8833,0	716	39889.4	Class1	10.8808,0	695	99689.2	Class1	10.8817,0	698	18492.3	Class1	10.8808,0	698	41014.7	Class1	10.8783,0	695	39831.9	Class1	10.88,0	638	37678.5	Class1	10.8717,0	711	111369	Class1	10.8808,0	650	117811			0		Class2	10.8692,0	616	39140.1	Class2	10.87,0	770	70902
Analyte 292	215	271.2	10.9237,0	41	217	Class1	10.9325,0	0	10242.4	Class1	10.9267,0	0	14645			0		Class1	10.9458,0	0	9267.3	Class1	10.9258,0	240	9856	Class1	10.9283,0	0	16314.9			0		Class1	10.9275,0	0	21104	Class2	10.93,0	0	82417.4			0		Class2	10.9208,0	265	26203.6
Itaconic acid	216	470.964	10.9663,0	63	117	Class1	10.9767,0	467	3.10764e+06	Class1	10.9725,0	0	1.91144e+06	Class1	10.9717,0	452	3.54274e+06	Class1	10.9758,0	499	3.0409e+06	Class1	10.9717,0	466	4.15636e+06	Class1	10.9775,0	465	8.52931e+06	Class1	10.9567,0	0	2.95321e+06	Class1	10.975,0	458	7.07121e+06			0		Class2	10.9575,0	0	2.07411e+06			0
fumaric acid	218	675.224	10.9942,0	68	245	Class1	10.9967,0	837	582497	Class1	10.9967,0	876	266506	Class1	10.9983,0	826	379238	Class1	10.9967,0	797	160714	Class1	10.9967,0	825	138277	Class1	10.9942,0	790	248039	Class1	10.9942,0	684	164600	Class1	10.9942,0	553	294284	Class2	11.0025,0	639	295619	Class2	10.9942,0	589	135210	Class2	10.9925,0	588	498325
unknown	219	290.923	11.0331,0	55	58	Class1	11.0442,0	338	1.45961e+06	Class1	11.0408,0	268	636304	Class1	11.0408,0	399	2.15589e+06	Class1	11.0417,0	512	927178	Class1	11.0392,0	245	1.52948e+06	Class1	11.0417,0	299	1.46729e+06	Class1	11.0292,0	0	917600			0		Class2	11.0433,0	442	2.68573e+06	Class2	11.03,0	0	950882			0
unknown	220	294	11.0474,0	37	97	Class1	11.0542,0	437	24667	Class1	11.0542,0	525	18936.9	Class1	11.0508,0	253	59873.3	Class1	11.0517,0	0	23481.9	Class1	11.05,0	0	48314.6			0		Class1	11.0425,0	326	25686.8	Class1	11.0492,0	286	47729.1	Class2	11.0567,0	0	70582	Class2	11.0467,0	213	28976.1	Class2	11.045,0	0	222240
serine 1	222	914.222	11.0785,0	64	218	Class1	11.0883,0	955	7.21836e+06	Class1	11.0808,0	949	1.68392e+06	Class1	11.0775,0	928	2.83344e+06	Class1	11.085,0	950	8.12569e+06	Class1	11.08,0	953	4.19491e+06	Class1	11.0842,0	953	7.91528e+06	Class1	11.065,0	916	816312	Class1	11.0817,0	944	4.89594e+06	Class2	11.095,0	925	2.03047e+07	Class2	11.0717,0	946	5.47274e+06	Class2	11.0733,0	940	1.16486e+07
Citraconic acid 4	226	464.303	11.1181,0	35	160	Class1	11.1267,0	476	395391	Class1	11.1225,0	435	120072	Class1	11.1225,0	501	659151	Class1	11.1233,0	494	342165	Class1	11.1208,0	473	679912			0				0		Class1	11.125,0	473	594266	Class2	11.1367,0	493	538562			0		Class2	11.1125,0	453	657184
Geraniol	227	194.556	11.1469,0	57	156	Class1	11.1575,0	293	71244.9	Class1	11.1542,0	0	14166.1			0		Class1	11.155,0	0	70855.2	Class1	11.155,0	480	66575			0				0				0		Class2	11.1533,0	116	307820	Class2	11.1425,0	0	97591.2	Class2	11.145,0	0	123994
Analyte 313	228	218.432	11.1715,0	56	255	Class1	11.1758,0	145	25455.5	Class1	11.1742,0	219	12752.9	Class1	11.1725,0	294	35302.3	Class1	11.1758,0	221	17416.2			0		Class1	11.1733,0	244	25153.1			0		Class1	11.1717,0	239	20182.8	Class2	11.175,0	166	39517.5	Class2	11.1475,0	0	2000.94			0
2,3-Dimethylsuccinic acid	231	461.706	11.2295,0	19	117	Class1	11.2308,0	527	128037	Class1	11.2308,0	384	67586.3	Class1	11.2258,0	474	311339			0		Class1	11.2267,0	507	142045	Class1	11.2317,0	441	129426	Class1	11.2117,0	0	90776	Class1	11.2292,0	520	110102	Class2	11.2317,0	444	312962			0				0
Analyte 325	234	441	11.2888,0	10	117	Class1	11.2917,0	0	235725	Class1	11.29,0	430	483171	Class1	11.2883,0	463	283381			0		Class1	11.2883,0	476	91964.2	Class1	11.2917,0	0	135816	Class1	11.275,0	420	91502.6	Class1	11.29,0	445	130120	Class2	11.2925,0	488	204564			0				0
Analyte 326	235	222.308	11.3077,0	52	171	Class1	11.3117,0	0	41313.4	Class1	11.3117,0	0	32732.1	Class1	11.3092,0	0	13009.2	Class1	11.3108,0	0	35830.5	Class1	11.3108,0	0	5164.75	Class1	11.3117,0	0	12041.5			0				0		Class2	11.315,0	0	15061	Class2	11.305,0	214	2594.92	Class2	11.3033,0	169	99579
Aminooxyacetic acid	238	516.8	11.3712,0	5	116	Class1	11.3725,0	493	78483.5			0				0				0		Class1	11.3708,0	591	30006.9	Class1	11.3708,0	444	38433.8	Class1	11.3725,0	559	60503.7			0				0				0				0
L-Allothreonine 1	241	920.077	11.4128,0	27	57	Class1	11.415,0	923	3.9496e+06	Class1	11.4133,0	907	3.96467e+06	Class1	11.4117,0	943	4.66545e+06	Class1	11.4142,0	938	2.38713e+06	Class1	11.4108,0	942	770402	Class1	11.4142,0	945	2.27482e+06	Class1	11.4,0	902	1.26442e+06			0		Class2	11.4208,0	927	1.28009e+07	Class2	11.405,0	922	4.09469e+06	Class2	11.405,0	903	2.87134e+06
Tartronic acid	249	468.267	11.5125,0	38	131	Class1	11.51,0	476	213977	Class1	11.5075,0	336	393703	Class1	11.5075,0	383	420975			0		Class1	11.51,0	575	235646	Class1	11.5067,0	220	101463	Class1	11.495,0	415	101030	Class1	11.5075,0	493	236053			0		Class2	11.4992,0	571	180879	Class2	11.5008,0	642	1.24817e+06
Analyte 342	250	261.444	11.5356,0	16	263	Class1	11.5383,0	171	91560.5	Class1	11.5367,0	288	235377	Class1	11.545,0	266	468587			0				0				0		Class1	11.525,0	301	77112.5			0				0		Class2	11.5317,0	0	26871.7			0
Analyte 349	256	280.5	11.4755,0	25	204			0				0		Class1	11.6225,0	0	62469.5			0		Class1	11.4575,0	0	4283.35	Class1	11.46,0	0	8848.06			0		Class1	11.5233,0	0	25204.3			0				0				0
2-methylfumarate	257	802.8	11.64,0	20	184	Class1	11.6433,0	791	17043.2	Class1	11.6408,0	847	71842.6	Class1	11.6408,0	871	207317			0		Class1	11.6375,0	872	81551.9	Class1	11.6383,0	870	40421.2	Class1	11.6375,0	896	48767.7	Class1	11.6375,0	842	50308.8	Class2	11.6433,0	923	101177	Class2	11.6433,0	873	38352.8	Class2	11.6367,0	824	67358.7
hydroquinone	261	747.883	11.6781,0	61	239	Class1	11.6808,0	773	46925.6	Class1	11.68,0	803	148565	Class1	11.6808,0	799	340848	Class1	11.6783,0	739	165567	Class1	11.6783,0	898	144847	Class1	11.6775,0	794	110488	Class1	11.6817,0	811	59453.9	Class1	11.6758,0	695	94276.3	Class2	11.6808,0	742	165210			0		Class2	11.68,0	787	157654
Analyte 355	262	413.6	11.6889,0	48	243	Class1	11.6942,0	566	14699.5	Class1	11.6967,0	409	62961.9	Class1	11.6967,0	0	136712	Class1	11.695,0	0	85420.3	Class1	11.6942,0	0	65792.1			0				0				0		Class2	11.7008,0	0	77277.5			0		Class2	11.6867,0	363	105131
Glutaric Acid	264	848.818	11.7014,0	11	97	Class1	11.705,0	770	28414.6	Class1	11.7017,0	856	220266	Class1	11.7025,0	874	321877	Class1	11.7,0	857	203913	Class1	11.6992,0	859	199783	Class1	11.7008,0	859	106995			0		Class1	11.6975,0	796	43747.9	Class2	11.7075,0	881	157184			0		Class2	11.6958,0	886	145229
Analyte 365	270	0	11.7427,0	68	103	Class1	11.75,0	0	2.13453e+06	Class1	11.7475,0	0	8.52918e+06	Class1	11.7458,0	0	9.9654e+06	Class1	11.7475,0	0	6.03186e+06	Class1	11.7458,0	0	6.31875e+06	Class1	11.7467,0	0	3.53014e+06	Class1	11.7392,0	0	1.69603e+06	Class1	11.7458,0	0	1.17014e+06	Class2	11.7533,0	0	9.11685e+06	Class2	11.7392,0	0	2.10415e+06	Class2	11.7417,0	0	4.86096e+06
Analyte 369	272	369.667	11.8232,0	14	103			0				0				0		Class1	11.8458,0	0	16411.9	Class1	11.805,0	0	32150.7			0		Class1	11.8383,0	0	20501.4	Class1	11.7133,0	0	0			0				0				0
N-Ethylglycine 1	276	485.462	11.8667,0	14	218	Class1	11.8733,0	473	196317	Class1	11.8725,0	574	243383	Class1	11.8717,0	411	119996			0		Class1	11.8675,0	541	91471.3			0		Class1	11.8633,0	383	35055.6	Class1	11.8733,0	492	193359			0		Class2	11.8633,0	491	65180.7	Class2	11.8658,0	543	1.01337e+06
beta-Alanine 2	281	862.403	11.9572,0	68	174	Class1	11.9642,0	918	431373	Class1	11.9633,0	955	733267	Class1	11.9625,0	965	345662	Class1	11.9625,0	922	322105	Class1	11.9608,0	878	313657	Class1	11.9617,0	762	71531.3	Class1	11.9533,0	944	79790.3	Class1	11.96,0	816	642973	Class2	11.9633,0	851	180831	Class2	11.9567,0	931	89938	Class2	11.9575,0	836	65736.2
unknown	284	397.727	12.0044,0	26	254	Class1	12.0117,0	369	299994			0		Class1	12.0125,0	420	333588	Class1	12.0108,0	334	330851	Class1	12.0092,0	662	318253	Class1	12.0042,0	504	196411			0		Class1	12.0067,0	339	410180			0				0				0
2-Deoxytetronic acid	286	905.762	12.0118,0	64	73	Class1	12.0167,0	914	3.34344e+07	Class1	12.015,0	900	5.11828e+07	Class1	12.0142,0	920	5.43931e+07	Class1	12.0158,0	902	4.39114e+07	Class1	12.0142,0	916	4.2946e+07	Class1	12.0167,0	910	2.17694e+07	Class1	12.0058,0	910	8.80974e+06	Class1	12.015,0	918	4.26227e+07	Class2	12.0225,0	915	4.32979e+07	Class2	12.0092,0	909	1.81126e+07	Class2	12.0092,0	900	1.78936e+07
D-erythronolactone 1	293	278.167	12.1261,0	54	82	Class1	12.13,0	318	7086473	Class1	12.1275,0	330	6.53014e+06	Class1	12.1283,0	435	4.45073e+06	Class1	12.1258,0	304	7.44517e+06	Class1	12.125,0	277	7.27756e+06	Class1	12.1267,0	0	8.03644e+06	Class1	12.1233,0	214	1.06548e+06	Class1	12.125,0	282	8.38265e+06	Class2	12.1367,0	257	650542	Class2	12.1217,0	210	2.75655e+06			0
Maleamate 4	295	409.5	12.1364,0	17	109	Class1	12.1392,0	370	284790	Class1	12.1383,0	438	306409	Class1	12.1325,0	575	128087	Class1	12.1367,0	451	303410	Class1	12.135,0	386	308832	Class1	12.1367,0	323	380443			0		Class1	12.135,0	433	323020	Class2	12.1417,0	305	193532	Class2	12.14,0	322	57100.4	Class2	12.1317,0	466	156844
Erythrose 1	304	525.844	12.2841,0	65	350	Class1	12.2867,0	474	3.60779e+06	Class1	12.2842,0	559	1.21719e+06	Class1	12.2833,0	565	1.13536e+06	Class1	12.2875,0	418	3.80254e+06	Class1	12.2842,0	479	3.81123e+06	Class1	12.2883,0	520	3.9376e+06	Class1	12.2733,0	555	390264			0		Class2	12.3,0	461	7.54638e+06			0		Class2	12.285,0	576	4.37759e+06
3-Aminoisobutyric acid 1	306	734.357	12.3537,0	61	174	Class1	12.3592,0	907	3.50219e+07			0		Class1	12.355,0	953	2.08068e+07	Class1	12.3617,0	938	4.83156e+07	Class1	12.36,0	939	5.34095e+07	Class1	12.3625,0	939	4.5359e+07	Class1	12.3467,0	0	1.23586e+07	Class1	12.36,0	940	4.78539e+07			0		Class2	12.345,0	359	1.08493e+06	Class2	12.3467,0	0	2117865
Aminomalonic acid	311	847.857	12.4919,0	7	218	Class1	12.4933,0	904	2.53178e+06	Class1	12.4908,0	819	1.18978e+06	Class1	12.4933,0	845	726935	Class1	12.49,0	846	3.81219e+06			0		Class1	12.4892,0	827	2.68019e+06	Class1	12.485,0	839	255131			0		Class2	12.5017,0	855	4.93067e+06			0				0
unknown	312	628.595	12.4917,0	43	73	Class1	12.4983,0	431	3.07324e+07	Class1	12.5017,0	481	1.50981e+07	Class1	12.4983,0	468	1.02088e+07	Class1	12.4958,0	492	3.96465e+07	Class1	12.4925,0	480	3.04584e+07			0		Class1	12.5017,0	269	4.22912e+06	Class1	12.4967,0	510	3.74755e+07			0		Class2	12.4933,0	500	8.52286e+06	Class2	12.4942,0	653	3.00325e+07
unknown	314	255.364	12.5077,0	23	255	Class1	12.5067,0	458	2.13141e+06	Class1	12.505,0	477	358728	Class1	12.5092,0	0	282087	Class1	12.5042,0	349	1.55912e+06	Class1	12.5033,0	0	1.15484e+06			0		Class1	12.5125,0	288	52629	Class1	12.5017,0	0	274997			0		Class2	12.5092,0	175	98244.6			0
(S)-Mandelic acid	317	551.6	12.5661,0	51	179	Class1	12.575,0	571	227095			0				0		Class1	12.5708,0	516	130125	Class1	12.5708,0	558	52603.4	Class1	12.5708,0	661	142899			0		Class1	12.485,0	531	39557	Class2	12.5742,0	552	81944.4	Class2	12.5717,0	588	18088			0
L-Malic acid	323	784.947	12.7075,0	40	55	Class1	12.7158,0	935	3.88451e+06	Class1	12.7142,0	928	1.30419e+06	Class1	12.7125,0	920	469155	Class1	12.7117,0	820	374476	Class1	12.7108,0	855	1.02833e+06	Class1	12.7117,0	886	699272	Class1	12.7067,0	814	71249.6			0		Class2	12.7167,0	909	811474	Class2	12.7083,0	789	103185	Class2	12.7108,0	864	403312
Threitol	332	934.06	12.8345,0	68	217	Class1	12.8408,0	956	7.76844e+06	Class1	12.8392,0	924	2.8014e+06	Class1	12.8375,0	928	2.19408e+06	Class1	12.8375,0	935	4.92264e+06	Class1	12.8267,0	910	1.60016e+06	Class1	12.8383,0	886	1.24898e+07	Class1	12.8292,0	926	1.05072e+06	Class1	12.8358,0	961	13259375	Class2	12.8425,0	917	7.77174e+06	Class2	12.8308,0	923	933988	Class2	12.8358,0	923	3.32536e+06
Analyte 477	337	426	13.0027,0	5	221			0		Class1	12.9325,0	0	1.06012e+06			0		Class1	13.0033,0	0	149360	Class1	13.0442,0	347	18724.8			0		Class1	13.0108,0	0	68321.6			0				0				0		Class2	13.0225,0	505	122061
Analyte 479	338	0	12.9485,0	65	217	Class1	12.9542,0	0	2.85404e+07	Class1	12.9517,0	0	2.2163e+07	Class1	12.95,0	0	1.89764e+07			0		Class1	12.95,0	0	1.61957e+07	Class1	12.9458,0	0	4.18188e+07	Class1	12.9392,0	0	10517466			0		Class2	12.9417,0	0	3.91823e+07	Class2	12.9433,0	0	1.00978e+07	Class2	12.9525,0	0	2.78145e+07
adipic acid	341	513.6	12.9711,0	56	111			0		Class1	12.9742,0	571	683869	Class1	12.9733,0	675	578060			0		Class1	12.9717,0	580	529137	Class1	12.9717,0	577	2.21969e+06	Class1	12.9683,0	597	204947	Class1	12.9642,0	474	1.54381e+06			0		Class2	12.9717,0	441	292379	Class2	12.9758,0	579	850387
asparagine 4	343	699.407	12.9861,0	55	128			0		Class1	12.9925,0	618	190677			0		Class1	12.9958,0	714	144100	Class1	12.9908,0	187	72402.1			0		Class1	12.9925,0	253	26206.3			0		Class2	12.9875,0	798	445911	Class2	12.9858,0	722	306924	Class2	12.995,0	749	186721
Acetol 1	348	431.615	13.0403,0	13	81	Class1	13.0433,0	449	2.9851e+06	Class1	13.0408,0	484	1.19364e+06	Class1	13.0417,0	454	1.0764e+06	Class1	13.0392,0	442	976045	Class1	13.04,0	470	1.45126e+06	Class1	13.0392,0	452	6.73385e+06	Class1	13.0367,0	446	433136	Class1	13.0375,0	504	2.85545e+06	Class2	13.0425,0	314	418696	Class2	13.0425,0	414	99906.8			0
methionine 1	358	720.016	13.1243,0	62	176	Class1	13.1292,0	560	289145	Class1	13.1267,0	642	90160.6	Class1	13.1275,0	664	64473.3	Class1	13.1267,0	649	80681.4	Class1	13.1258,0	489	63759.8	Class1	13.125,0	483	108920			0		Class1	13.1267,0	544	105944	Class2	13.1292,0	825	176873	Class2	13.1258,0	751	103252	Class2	13.1267,0	701	78304.8
oxoproline	359	902.193	13.2065,0	58	156	Class1	13.2175,0	930	8.78356e+07	Class1	13.21,0	942	2.8854e+07	Class1	13.2092,0	945	43727581	Class1	13.2108,0	915	45541690			0				0		Class1	13.2,0	946	1.27703e+07	Class1	13.2092,0	897	102326649	Class2	13.2308,0	887	9.9103e+07	Class2	13.2,0	915	1.82179e+07	Class2	13.2092,0	922	3.20548e+07
unknown	366	244.071	13.328,0	63	81	Class1	13.3342,0	151	839038	Class1	13.3292,0	0	1.04056e+06	Class1	13.3283,0	253	921695	Class1	13.3275,0	329	1.74593e+06	Class1	13.3267,0	266	1.15598e+06	Class1	13.3258,0	247	4.99417e+06	Class1	13.3217,0	0	448043	Class1	13.3242,0	280	1.17101e+06	Class2	13.3342,0	215	1.19936e+06	Class2	13.3317,0	268	756555	Class2	13.3358,0	340	729237
Analyte 528	369	580.8	13.3811,0	54	292	Class1	13.3783,0	0	7.36564e+06	Class1	13.3758,0	0	9.28382e+06	Class1	13.3733,0	0	8.02177e+06	Class1	13.3767,0	0	1.1973e+07	Class1	13.3742,0	0	1.09329e+07	Class1	13.3758,0	0	2.13939e+07	Class1	13.3608,0	0	4.03806e+06	Class1	13.3733,0	0	9.05386e+06	Class2	13.3883,0	0	1.94016e+07	Class2	13.38,0	0	3.06272e+06	Class2	13.3992,0	0	1.1022e+07
pyrogallol	374	290.278	13.4245,0	38	254			0				0		Class1	13.4225,0	373	103823			0		Class1	13.4192,0	286	143252			0		Class1	13.4242,0	318	52301.1	Class1	13.4167,0	299	123209			0		Class2	13.4333,0	287	114828			0
creatine	379	870.9	13.5452,0	10	115	Class1	13.5417,0	932	3.13919e+07			0				0		Class1	13.5342,0	861	1.77123e+07			0		Class1	13.5183,0	703	3.02147e+07	Class1	13.52,0	926	2.89045e+06	Class1	13.5325,0	755	1.12744e+07	Class2	13.5558,0	842	9.43251e+07	Class2	13.5633,0	899	135274618	Class2	13.5817,0	940	4.35138e+07
Threonic acid	382	844.559	13.5744,0	59	292	Class1	13.5708,0	919	2.62919e+06	Class1	13.5692,0	787	2.88522e+06	Class1	13.5667,0	931	2.49848e+06	Class1	13.57,0	874	3.13895e+06			0		Class1	13.57,0	861	8.88773e+06	Class1	13.5592,0	921	820349	Class1	13.5683,0	907	4.467e+06	Class2	13.585,0	821	5.95268e+06			0				0
unknown	383	592.294	13.6257,0	36	219			0				0		Class1	13.6233,0	655	75418.4			0		Class1	13.6217,0	663	82370	Class1	13.6242,0	468	330595	Class1	13.615,0	633	34984.6	Class1	13.6217,0	655	166269	Class2	13.6325,0	602	222711	Class2	13.6183,0	420	53186.3	Class2	13.6275,0	415	105685
2-hydroxy-2-phenylacetic acid	387	542.778	13.7111,0	36	164	Class1	13.7092,0	779	35076.3	Class1	13.7083,0	698	24704	Class1	13.71,0	741	18662.8	Class1	13.7058,0	544	31609			0		Class1	13.705,0	571	92597.6			0				0		Class2	13.7142,0	768	52979.8	Class2	13.7092,0	514	17775.4			0
2-hydroxy-3-isopropylbutanedioic acid	390	456.646	13.7647,0	69	129	Class1	13.7625,0	479	3.13533e+06	Class1	13.76,0	460	2.21557e+06	Class1	13.7592,0	471	1.8035e+06	Class1	13.7592,0	437	2.08858e+06	Class1	13.7592,0	466	2.26808e+06	Class1	13.7583,0	534	5.61061e+06	Class1	13.7542,0	479	720563	Class1	13.7592,0	474	3.22681e+06	Class2	13.78,0	510	5.05131e+06	Class2	13.7575,0	442	893760	Class2	13.7658,0	450	2.8372e+06
alpha-ketoglutaric acid	393	813.597	13.7902,0	62	89	Class1	13.7883,0	779	1.51381e+06	Class1	13.7875,0	697	1.00933e+06	Class1	13.7867,0	855	879976	Class1	13.7867,0	812	1.21967e+06			0		Class1	13.7875,0	879	1.91739e+06	Class1	13.7858,0	840	326482	Class1	13.785,0	874	1.56383e+06			0		Class2	13.7883,0	837	588645	Class2	13.79,0	930	1.88152e+06
Analyte 573	395	492.364	13.8074,0	51	103	Class1	13.8067,0	454	1.04349e+06	Class1	13.805,0	493	663092	Class1	13.805,0	523	577364			0				0				0		Class1	13.8,0	585	236399	Class1	13.8025,0	0	930270			0		Class2	13.8042,0	554	298161	Class2	13.8092,0	0	684407
unknown	401	434.98	13.9001,0	57	122	Class1	13.8983,0	474	167720	Class1	13.8958,0	435	138550	Class1	13.8975,0	349	120442	Class1	13.8958,0	482	183993	Class1	13.8958,0	479	154573	Class1	13.8958,0	439	194031	Class1	13.8958,0	441	55050.3			0				0		Class2	13.8975,0	435	94204.5	Class2	13.9008,0	468	478202
Analyte 585	403	392.25	13.9531,0	68	116	Class1	13.9533,0	0	5.19544e+06	Class1	13.9517,0	0	4.12288e+06	Class1	13.9508,0	0	3.42462e+06	Class1	13.9525,0	386	4.79176e+06	Class1	13.9508,0	0	4.2974e+06	Class1	13.9517,0	0	5.79622e+06	Class1	13.945,0	0	1.57757e+06	Class1	13.9508,0	0	5.8377e+06	Class2	13.9583,0	0	3.17632e+06	Class2	13.9483,0	0	3.58147e+06	Class2	13.9567,0	0	6.63699e+06
Analyte 592	409	196.867	14.0046,0	18	116	Class1	14.0092,0	174	273164			0		Class1	14.0067,0	0	190735			0		Class1	14.0058,0	112	209772			0		Class1	14.0033,0	82	86100			0				0				0				0
Analyte 593	410	511.796	14.0375,0	64	103	Class1	14.04,0	436	651045	Class1	14.0392,0	537	572043	Class1	14.0392,0	518	461095	Class1	14.0392,0	549	642244	Class1	14.0375,0	500	582699			0		Class1	14.0267,0	565	209614	Class1	14.035,0	510	687996	Class2	14.0433,0	506	551145	Class2	14.0367,0	437	401881			0
D-alanyl-D-alanine 2	411	222.305	14.0547,0	64	174	Class1	14.0558,0	310	179330	Class1	14.055,0	344	141335	Class1	14.0533,0	283	130075	Class1	14.0542,0	196	273526	Class1	14.0542,0	161	245613	Class1	14.0525,0	0	404054	Class1	14.0483,0	307	115054	Class1	14.0517,0	200	399471	Class2	14.0608,0	193	130110			0				0
3-hydroxy-3-methylglutaric acid	412	896.853	14.0754,0	69	109	Class1	14.0783,0	902	593637	Class1	14.0767,0	910	451977	Class1	14.0767,0	897	384568	Class1	14.0758,0	904	571539	Class1	14.075,0	897	467816	Class1	14.075,0	914	686291	Class1	14.0717,0	931	179423	Class1	14.0733,0	883	622600	Class2	14.0833,0	910	649701	Class2	14.0742,0	867	199604	Class2	14.0767,0	912	822695
unknown	413	362.54	14.0862,0	50	188	Class1	14.0842,0	461	121719			0		Class1	14.09,0	429	58651.9	Class1	14.0883,0	347	117762	Class1	14.0875,0	347	89855.6	Class1	14.0867,0	468	136603	Class1	14.0858,0	289	32602	Class1	14.0867,0	420	118635	Class2	14.1017,0	296	216451	Class2	14.0833,0	272	51555.2			0
pimelic acid	417	609.556	14.1328,0	9	69	Class1	14.1267,0	836	482839	Class1	14.1267,0	853	583233	Class1	14.1358,0	380	742368	Class1	14.1375,0	486	539404	Class1	14.1333,0	552	480307	Class1	14.135,0	557	690321	Class1	14.1275,0	749	170793			0		Class2	14.1358,0	428	775538	Class2	14.1367,0	645	139174			0
hexadecane	422	269.652	14.1464,0	50	255	Class1	14.1517,0	182	141096	Class1	14.1442,0	256	630308	Class1	14.145,0	306	1.09527e+06	Class1	14.145,0	254	316871	Class1	14.1458,0	0	270151	Class1	14.1425,0	0	378053	Class1	14.155,0	272	65699	Class1	14.1408,0	0	419006	Class2	14.1442,0	234	585116	Class2	14.1583,0	0	18372.4			0
3-hydroxyphenylacetic acid	428	676.412	14.194,0	17	164	Class1	14.1992,0	886	184643	Class1	14.1992,0	716	141141	Class1	14.2,0	764	122508	Class1	14.1958,0	806	170867	Class1	14.1975,0	775	148310	Class1	14.195,0	784	195773	Class1	14.2042,0	721	66635.5			0				0				0				0
Analyte 619	431	499.5	14.2414,0	54	215	Class1	14.2425,0	0	477838			0		Class1	14.2417,0	0	317178	Class1	14.24,0	0	444036			0		Class1	14.2392,0	0	471337	Class1	14.2358,0	0	155821	Class1	14.2383,0	0	489262	Class2	14.2492,0	0	219281	Class2	14.2375,0	0	120271	Class2	14.24,0	0	393283
2-mercaptoethanesulfonic acid 2	432	284.268	14.247,0	50	266	Class1	14.25,0	263	100106			0		Class1	14.25,0	291	82662	Class1	14.2475,0	312	141232	Class1	14.2475,0	323	145695	Class1	14.2458,0	313	204657	Class1	14.25,0	0	78436.5	Class1	14.2442,0	275	296570			0		Class2	14.2525,0	259	32424			0
unknown	433	373.965	14.2605,0	66	146	Class1	14.2633,0	319	283928	Class1	14.2625,0	218	212314	Class1	14.2625,0	287	182990	Class1	14.2617,0	314	240071	Class1	14.2608,0	0	197247	Class1	14.2608,0	294	202454	Class1	14.2592,0	235	52189.4	Class1	14.26,0	413	194610	Class2	14.265,0	426	513702	Class2	14.26,0	437	192938	Class2	14.2625,0	318	304426
Analyte 624	436	444.5	14.3112,0	68	69	Class1	14.315,0	0	1.87067e+06	Class1	14.3142,0	0	1.47765e+06	Class1	14.3133,0	0	1.21051e+06	Class1	14.3125,0	0	1.71146e+06	Class1	14.3125,0	0	1.56049e+06	Class1	14.3117,0	0	1.86588e+06	Class1	14.3083,0	0	686799	Class1	14.3092,0	0	1.82991e+06	Class2	14.315,0	0	2.12333e+06	Class2	14.3117,0	0	736356	Class2	14.3125,0	0	1.55501e+06
phenylalanine 1	443	789.118	14.3978,0	17	218	Class1	14.4,0	827	593070	Class1	14.3992,0	826	426146	Class1	14.4,0	855	294396	Class1	14.3975,0	700	440362	Class1	14.3967,0	804	294910	Class1	14.395,0	678	336556	Class1	14.3983,0	701	127332	Class1	14.3992,0	467	311884			0		Class2	14.3983,0	879	570596	Class2	14.3975,0	770	446660
Analyte 637	444	271	14.4258,0	37	355	Class1	14.4275,0	390	4410.72	Class1	14.4275,0	0	4046.96			0		Class1	14.4267,0	332	18827.3	Class1	14.4275,0	0	50965.3	Class1	14.4267,0	373	71935.4	Class1	14.4242,0	0	35863.8	Class1	14.425,0	0	72296.4			0		Class2	14.4275,0	244	5095.5			0
4-Hydroxybenzoic acid	446	799.565	14.4454,0	63	267	Class1	14.4458,0	837	274944	Class1	14.4458,0	862	216061	Class1	14.4467,0	832	180317	Class1	14.4433,0	852	265416	Class1	14.4442,0	889	239516	Class1	14.4417,0	857	312149	Class1	14.4525,0	773	112005	Class1	14.4392,0	848	328255	Class2	14.4425,0	867	429888	Class2	14.455,0	761	124830			0
tartaric acid	448	900.889	14.474,0	9	292	Class1	14.4708,0	888	863553			0		Class1	14.4683,0	919	571991	Class1	14.4692,0	917	846492	Class1	14.4683,0	902	690662	Class1	14.4683,0	918	871184	Class1	14.4625,0	917	274052			0				0				0		Class2	14.5208,0	924	3.43386e+07
4-hydroxyphenylacetic acid	452	749.25	14.5578,0	61	179	Class1	14.5575,0	750	1.90041e+06	Class1	14.5583,0	810	1.55021e+06	Class1	14.5583,0	834	1.32721e+06	Class1	14.5567,0	809	1.99061e+06	Class1	14.5567,0	813	1.61572e+06	Class1	14.555,0	808	2.01974e+06	Class1	14.5608,0	585	634101	Class1	14.5533,0	829	2.13971e+06			0		Class2	14.5642,0	700	561229			0
unknown	454	381.034	14.5826,0	60	245	Class1	14.5867,0	366	313812	Class1	14.5858,0	383	245836	Class1	14.585,0	383	206236	Class1	14.5842,0	344	294987	Class1	14.5842,0	379	237117	Class1	14.5833,0	295	296284	Class1	14.5792,0	0	100427	Class1	14.5808,0	367	317724	Class2	14.5867,0	230	458481	Class2	14.5825,0	552	145236			0
unknown	455	290.231	14.5904,0	26	193	Class1	14.5942,0	402	206937	Class1	14.5933,0	279	167055	Class1	14.5925,0	291	132535	Class1	14.5908,0	255	201416	Class1	14.59,0	291	165519	Class1	14.5892,0	277	210365	Class1	14.5925,0	322	66565.2	Class1	14.5875,0	275	224066			0				0				0
unknown	457	412.511	14.6141,0	51	175	Class1	14.6175,0	333	550625	Class1	14.6158,0	461	414476	Class1	14.615,0	433	336108			0		Class1	14.6133,0	450	408347			0		Class1	14.61,0	459	175870	Class1	14.6108,0	459	519271			0		Class2	14.6125,0	438	220120	Class2	14.6325,0	453	835845
Lyxose 1	459	932.652	14.6464,0	23	103	Class1	14.6692,0	913	1.24066e+07	Class1	14.6675,0	939	1.05579e+07	Class1	14.6667,0	952	8.83193e+06	Class1	14.6675,0	951	1.38147e+07	Class1	14.6658,0	952	1.05998e+07	Class1	14.6658,0	948	1.26887e+07	Class1	14.6592,0	953	4.00454e+06	Class1	14.6642,0	950	13029704			0		Class2	14.6617,0	958	2.41285e+06			0
Analyte 660	460	233.182	14.6989,0	17	122	Class1	14.6933,0	217	99578.1	Class1	14.695,0	0	86767	Class1	14.6958,0	0	81310.2			0		Class1	14.6958,0	261	88492.7	Class1	14.6983,0	277	111256			0		Class1	14.6917,0	262	121796			0				0				0
allose 1	462	610.65	14.7011,0	20	97	Class1	14.7058,0	642	962635	Class1	14.7042,0	632	899893	Class1	14.7025,0	630	757206	Class1	14.7033,0	618	997990	Class1	14.7025,0	628	946305	Class1	14.7025,0	614	1.15967e+06	Class1	14.6958,0	625	376386	Class1	14.7008,0	620	1.21841e+06	Class2	14.7067,0	584	1.4268e+06	Class2	14.7,0	617	342047			0
xylose 1	464	928.375	14.7486,0	8	307			0		Class1	14.75,0	954	1.96202e+06	Class1	14.7492,0	946	1.69479e+06	Class1	14.7492,0	927	2.56151e+06	Class1	14.7483,0	927	2.14771e+06			0		Class1	14.7417,0	941	634149			0				0		Class2	14.745,0	947	548074			0
unknown	467	412.667	14.7813,0	67	245	Class1	14.785,0	243	831970	Class1	14.7833,0	0	688865	Class1	14.7825,0	400	593479	Class1	14.7825,0	0	864843	Class1	14.7808,0	429	712514	Class1	14.7817,0	0	866091	Class1	14.7758,0	448	266940	Class1	14.7792,0	0	902098	Class2	14.785,0	428	1.0874e+06	Class2	14.7808,0	0	358472	Class2	14.785,0	516	988681
N-acetyl-L-aspartic acid 1	468	715.417	14.7946,0	12	158			0		Class1	14.7975,0	601	346986			0		Class1	14.7917,0	793	555410	Class1	14.7925,0	779	445335	Class1	14.7917,0	813	642140	Class1	14.8092,0	627	121839	Class1	14.7925,0	691	616437			0		Class2	14.8008,0	660	161118			0
Analyte 672	469	221.143	14.8287,0	45	239	Class1	14.8333,0	269	8269.84	Class1	14.8292,0	219	7102.53			0				0		Class1	14.8275,0	0	11574.9	Class1	14.8283,0	88	10885.5			0		Class1	14.8258,0	0	9367.46	Class2	14.8325,0	0	8977.88	Class2	14.8308,0	187	4261.21	Class2	14.8367,0	261	9246.76
Analyte 673	470	158.636	14.8388,0	45	156	Class1	14.8433,0	0	88702.2	Class1	14.8425,0	201	75833.9	Class1	14.8417,0	93	65175.1	Class1	14.8392,0	110	91612.1	Class1	14.84,0	152	71645	Class1	14.8392,0	219	65085.2			0		Class1	14.8375,0	30	70012.9	Class2	14.8433,0	169	112277	Class2	14.8367,0	230	25309.4	Class2	14.8417,0	0	50939.4
Analyte 676	473	368	14.8936,0	68	173	Class1	14.8975,0	0	1.3801e+06	Class1	14.8967,0	0	1.06316e+06	Class1	14.895,0	0	916443	Class1	14.8958,0	0	1.36105e+06	Class1	14.8942,0	0	1.0817e+06	Class1	14.8942,0	0	1.38299e+06	Class1	14.8892,0	0	455962	Class1	14.8925,0	0	1.47278e+06	Class2	14.8983,0	0	2.38471e+06	Class2	14.8925,0	0	376639	Class2	14.8975,0	0	1.21132e+06
ribose	474	889.507	14.9161,0	69	217	Class1	14.9192,0	925	1.58939e+06	Class1	14.9183,0	927	1.20653e+06	Class1	14.9175,0	918	1.03796e+06	Class1	14.9175,0	908	1.52036e+06	Class1	14.9167,0	924	1.21758e+06	Class1	14.9167,0	917	1.5769e+06	Class1	14.9108,0	902	525947	Class1	14.9142,0	918	1.70525e+06	Class2	14.92,0	904	2.20552e+06	Class2	14.915,0	883	451593	Class2	14.9208,0	908	1.28892e+06
unknown	475	262.053	14.9336,0	37	320			0		Class1	14.935,0	311	22250.4			0		Class1	14.935,0	0	32208.3	Class1	14.9342,0	0	24425.1	Class1	14.9325,0	0	39871.5			0		Class1	14.9317,0	0	38238.2	Class2	14.9383,0	0	51907.8			0				0
Ribonic acid, gamma-lactone	478	639.177	15.0069,0	64	217	Class1	14.9967,0	521	229436	Class1	14.9958,0	297	175214	Class1	14.995,0	345	156611	Class1	14.9933,0	521	208266	Class1	14.9942,0	482	175138	Class1	14.9925,0	479	219775	Class1	14.9933,0	459	77354.7	Class1	14.9908,0	376	230820	Class2	14.9958,0	351	174652	Class2	15.0117,0	704	65025	Class2	15.0133,0	546	282871
Analyte 689	482	366.341	15.0608,0	59	159			0		Class1	15.0617,0	297	91124.6	Class1	15.0633,0	292	61679.3	Class1	15.0625,0	0	89480.6	Class1	15.0625,0	0	52266.6	Class1	15.0583,0	541	54762.4	Class1	15.0575,0	302	27038.4	Class1	15.0583,0	358	53918.1	Class2	15.0642,0	0	76888.9	Class2	15.0608,0	0	61235.8	Class2	15.0642,0	189	47289
unknown	485	419.623	15.1123,0	54	218	Class1	15.11,0	385	283921	Class1	15.1083,0	361	212189	Class1	15.1067,0	358	167206	Class1	15.1083,0	222	223809	Class1	15.115,0	290	148594	Class1	15.115,0	441	168236	Class1	15.11,0	287	55094.9	Class1	15.1117,0	262	145510	Class2	15.1133,0	440	311604	Class2	15.1058,0	422	153159	Class2	15.1108,0	331	342088
xylitol	488	811.556	15.127,0	9	217	Class1	15.13,0	815	181035	Class1	15.1292,0	822	128210	Class1	15.1292,0	817	121080			0		Class1	15.1258,0	765	129814	Class1	15.1275,0	840	161513	Class1	15.12,0	820	59907.6	Class1	15.125,0	841	170615			0		Class2	15.1267,0	778	39560.9	Class2	15.13,0	806	474994
unknown	495	691.179	15.1811,0	28	42	Class1	15.1867,0	550	706148	Class1	15.1833,0	710	576593			0		Class1	15.185,0	720	507060	Class1	15.1833,0	687	551622	Class1	15.1817,0	572	479726	Class1	15.1767,0	710	160216	Class1	15.18,0	708	699207	Class2	15.1858,0	801	633639	Class2	15.1817,0	742	282378			0
Analyte 706	497	350.5	15.1981,0	4	139	Class1	15.1992,0	0	116254	Class1	15.1992,0	0	97334.6	Class1	15.1992,0	354	79557.1			0				0				0		Class1	15.195,0	347	35841.9			0				0				0				0
N-formyl-L-methionine 2	498	381.254	15.2069,0	68	175	Class1	15.2108,0	381	1.83934e+06	Class1	15.2083,0	335	1.40786e+06	Class1	15.2083,0	382	1.19952e+06	Class1	15.2075,0	382	1.67795e+06	Class1	15.2075,0	398	1.32772e+06	Class1	15.2058,0	374	1.60737e+06	Class1	15.2033,0	442	545631	Class1	15.2042,0	388	1.71187e+06	Class2	15.2125,0	363	1.58198e+06	Class2	15.2067,0	321	656758	Class2	15.2092,0	385	1.67365e+06
Methoxamedrine 2	505	137.793	15.3255,0	32	94	Class1	15.3267,0	216	133918	Class1	15.3267,0	218	97855.2			0		Class1	15.3233,0	127	118979	Class1	15.3233,0	0	95728.2			0				0				0				0				0		Class2	15.3267,0	158	224411
unknown	506	200.091	15.3326,0	14	268			0		Class1	15.3392,0	0	45622.6			0		Class1	15.335,0	0	52215.1	Class1	15.335,0	211	50502.1			0				0		Class1	15.33,0	259	68497.3			0				0				0
6-deoxy-D-glucose 1	507	368.362	15.352,0	69	276	Class1	15.3533,0	337	338509	Class1	15.3525,0	286	256985	Class1	15.3533,0	244	219689	Class1	15.3525,0	316	272148	Class1	15.3525,0	469	210055	Class1	15.3508,0	251	240465	Class1	15.3575,0	317	76986.4	Class1	15.35,0	475	215812	Class2	15.3517,0	348	1.05514e+06	Class2	15.3525,0	322	303518	Class2	15.3533,0	268	456605
D-Arabitol	509	942.262	15.392,0	62	217	Class1	15.395,0	961	18047942	Class1	15.3933,0	951	1.48813e+07	Class1	15.3908,0	798	1.30645e+07	Class1	15.3942,0	964	1.78737e+07	Class1	15.3925,0	960	1.5166e+07	Class1	15.3925,0	964	1.92611e+07	Class1	15.3825,0	953	7.87221e+06	Class1	15.3908,0	963	2.12794e+07	Class2	15.4008,0	956	3.8488e+07	Class2	15.3967,0	967	1.9499e+07	Class2	15.3925,0	929	1.47055e+07
unknown	514	378.542	15.5048,0	28	259	Class1	15.51,0	279	24556.5	Class1	15.5075,0	304	15544.5			0		Class1	15.5075,0	448	26614.3	Class1	15.5042,0	226	19189.3	Class1	15.505,0	281	21361.8	Class1	15.5042,0	0	11262	Class1	15.505,0	286	26378.8			0				0		Class2	15.5067,0	264	17658.7
3-(3-hydroxyphenyl)propionic acid	515	668.527	15.5486,0	55	192	Class1	15.5508,0	714	125549	Class1	15.55,0	830	93814.3	Class1	15.55,0	760	80654.6	Class1	15.5492,0	700	127550	Class1	15.5483,0	700	97563.3	Class1	15.5475,0	804	133502	Class1	15.5475,0	753	41521.8	Class1	15.5458,0	799	144443	Class2	15.5525,0	598	35730.5	Class2	15.5542,0	353	14113.1	Class2	15.5508,0	494	43346.5
quinolinic acid	517	770.211	15.5733,0	59	194			0		Class1	15.5767,0	462	118838	Class1	15.5883,0	698	124881	Class1	15.575,0	596	263433	Class1	15.5742,0	710	224853			0				0		Class1	15.5692,0	777	338364	Class2	15.5767,0	572	213876	Class2	15.5867,0	560	73626.7	Class2	15.5725,0	828	247021
fucose 2	519	912.779	15.593,0	69	117	Class1	15.5975,0	928	3.79164e+06	Class1	15.5958,0	938	2.92612e+06	Class1	15.595,0	914	2.52382e+06	Class1	15.5967,0	930	3.77882e+06	Class1	15.5942,0	959	3.02616e+06	Class1	15.5942,0	936	3.58882e+06	Class1	15.5875,0	899	1.13968e+06	Class1	15.5917,0	931	3.89068e+06	Class2	15.6,0	941	3.39266e+06	Class2	15.5942,0	850	801574	Class2	15.5933,0	964	2.79405e+06
Ciliatine	522	216.432	15.6304,0	39	228	Class1	15.6333,0	215	17512.5	Class1	15.6342,0	145	11363.9			0		Class1	15.6317,0	182	17094.5	Class1	15.6283,0	0	9782.76	Class1	15.63,0	231	15487.9			0				0		Class2	15.635,0	216	24108.1			0				0
flavin adenine degrad product	525	666.706	15.6776,0	17	204	Class1	15.6833,0	689	800602	Class1	15.6808,0	678	585262	Class1	15.68,0	676	450298	Class1	15.6792,0	675	531550	Class1	15.6783,0	685	413893	Class1	15.6792,0	679	484684	Class1	15.6733,0	676	219330	Class1	15.6767,0	662	503509			0				0		Class2	15.6783,0	673	167145
Aconitic Acid	530	947.509	15.7311,0	57	147	Class1	15.7325,0	971	1.00175e+07	Class1	15.7308,0	975	8.26338e+06	Class1	15.7308,0	974	7.54901e+06	Class1	15.7325,0	971	1.23867e+07	Class1	15.73,0	963	9.02605e+06	Class1	15.7308,0	958	1.14266e+07	Class1	15.7225,0	943	2.44892e+06	Class1	15.7283,0	972	1.09431e+07	Class2	15.7358,0	969	2.11442e+07	Class2	15.7283,0	967	3.23687e+06	Class2	15.7342,0	969	1.28024e+07
Glucose-1-phosphate	535	264.5	15.823,0	10	69			0		Class1	15.8258,0	0	56043.7			0		Class1	15.8258,0	0	59698.7	Class1	15.8242,0	0	53914.7			0				0		Class1	15.82,0	0	60130.5			0				0				0
Diglycerol 1	537	663.304	15.8639,0	58	292	Class1	15.8667,0	443	827914			0		Class1	15.8633,0	719	560595			0		Class1	15.8667,0	687	635775	Class1	15.8633,0	701	774274	Class1	15.8567,0	631	270175	Class1	15.86,0	631	852001	Class2	15.8742,0	672	981418	Class2	15.8658,0	563	240086	Class2	15.8667,0	712	719293
3-Hydroxyanthranilic acid	540	310.269	15.8984,0	31	97			0				0		Class1	15.8992,0	401	196409	Class1	15.8967,0	458	301099	Class1	15.8975,0	450	229332	Class1	15.8975,0	272	292380			0		Class1	15.895,0	449	321654			0				0		Class2	15.9067,0	252	379287
4-hydroxy-3-methoxybenzoic acid;	543	254.692	15.9345,0	22	111			0		Class1	15.9392,0	0	118241	Class1	15.9383,0	171	97725			0		Class1	15.935,0	0	114532	Class1	15.935,0	227	141695			0		Class1	15.9325,0	225	158044			0				0		Class2	15.9383,0	0	137306
Homovanillic acid	547	796.778	16.0122,0	9	209	Class1	16.0133,0	796	765880	Class1	16.0117,0	797	570940	Class1	16.0133,0	849	511004	Class1	16.0108,0	746	772633	Class1	16.0108,0	858	568364	Class1	16.0092,0	827	691422	Class1	16.0158,0	728	243994			0				0				0				0
unknown	550	556.455	16.0322,0	22	292	Class1	16.0392,0	508	1.29963e+06	Class1	16.0333,0	553	873358	Class1	16.0325,0	557	766038	Class1	16.0367,0	537	1.29946e+06	Class1	16.035,0	560	927059	Class1	16.0317,0	551	1.07948e+06	Class1	16.0258,0	549	361390	Class1	16.03,0	555	1.17237e+06	Class2	16.04,0	559	3.83903e+06	Class2	16.0308,0	496	434982			0
2-deoxy-D-glucose 1	551	606.283	16.0405,0	61	103	Class1	16.0425,0	701	1.54667e+07	Class1	16.0417,0	637	1.04939e+07	Class1	16.0417,0	631	9.01129e+06	Class1	16.0417,0	673	1.54582e+07	Class1	16.04,0	662	11325508	Class1	16.04,0	636	1.2168e+07	Class1	16.0342,0	662	4.1629e+06	Class1	16.0375,0	644	1.32108e+07	Class2	16.045,0	698	4.62804e+07	Class2	16.0375,0	614	4.3364e+06	Class2	16.0467,0	530	1.95131e+07
O-Phosphorylethanolamine	554	665.533	16.0992,0	61	299	Class1	16.1042,0	776	95485.3	Class1	16.1025,0	786	74344.3	Class1	16.1033,0	779	72613.7	Class1	16.1008,0	805	105684	Class1	16.1,0	783	94834.1	Class1	16.1,0	746	125638	Class1	16.0975,0	539	31548.6	Class1	16.0992,0	619	128042	Class2	16.115,0	643	43654.6			0				0
gentisic acid	555	328.182	16.1023,0	11	429			0				0				0		Class1	16.1067,0	102	8274.83	Class1	16.1042,0	406	17702	Class1	16.105,0	271	20000.6	Class1	16.1017,0	389	11349.5			0				0				0				0
unknown	558	518.438	16.2079,0	16	84	Class1	16.2167,0	515	113558	Class1	16.2167,0	549	96208.8	Class1	16.2192,0	420	102916	Class1	16.2092,0	583	200556			0		Class1	16.2075,0	497	184901			0				0				0		Class2	16.215,0	583	158262	Class2	16.2142,0	547	336625
azelaic acid	561	799.241	16.2649,0	29	55	Class1	16.265,0	866	1.16069e+06	Class1	16.2642,0	882	950558	Class1	16.2642,0	901	841310	Class1	16.2617,0	844	1.12963e+06	Class1	16.2617,0	917	911420	Class1	16.2608,0	877	1.08202e+06	Class1	16.2633,0	826	359772	Class1	16.2575,0	896	1.14169e+06	Class2	16.2667,0	889	5.62868e+06	Class2	16.2742,0	872	459067	Class2	16.27,0	882	1.4161e+06
shikimic acid	567	696.667	16.3724,0	6	204	Class1	16.3767,0	682	251373	Class1	16.3742,0	749	162637	Class1	16.3742,0	666	148024			0		Class1	16.3758,0	707	159035			0		Class1	16.3567,0	715	74757.4	Class1	16.3767,0	661	200367			0				0				0
Analyte 827	569	457.167	16.3963,0	30	82	Class1	16.3992,0	0	2.93513e+06	Class1	16.3967,0	0	2.24495e+06	Class1	16.3967,0	0	1.97188e+06	Class1	16.4008,0	0	2.75632e+06	Class1	16.3975,0	633	2.29213e+06	Class1	16.3983,0	266	2.77824e+06	Class1	16.3858,0	0	1.02904e+06	Class1	16.395,0	0	3.01808e+06	Class2	16.3942,0	0	6.34403e+06	Class2	16.3983,0	0	822819	Class2	16.4175,0	294	5.51205e+06
isocitric acid 1	574	620.649	16.51,0	58	245			0		Class1	16.5008,0	678	2.59332e+06	Class1	16.4992,0	515	2.5305e+06	Class1	16.5092,0	544	2.66378e+06	Class1	16.5025,0	752	2.50013e+06	Class1	16.5083,0	673	2.76512e+06			0		Class1	16.5067,0	592	2.87962e+06			0		Class2	16.4983,0	627	1.96257e+06			0
3,4-Dihydroxyphenylacetic acid	579	725.143	16.5981,0	7	179			0		Class1	16.5975,0	763	517497			0				0		Class1	16.5958,0	875	552255	Class1	16.5983,0	775	515098	Class1	16.5808,0	813	218033			0		Class2	16.6233,0	496	189727	Class2	16.5975,0	527	70420.1			0
Tagatose 1	580	549.2	16.6075,0	9	217	Class1	16.6142,0	553	907063	Class1	16.6117,0	542	697776			0		Class1	16.6133,0	623	836614			0				0		Class1	16.5967,0	0	248585			0		Class2	16.6283,0	584	367233	Class2	16.6042,0	444	152248			0
Analyte 856	587	340.429	16.6417,0	16	287	Class1	16.6983,0	500	103438	Class1	16.6333,0	0	117078	Class1	16.6317,0	0	106966			0		Class1	16.6317,0	359	118105	Class1	16.6342,0	378	176758	Class1	16.62,0	403	46148.3			0		Class2	16.65,0	0	193696	Class2	16.6292,0	0	57293.7			0
beta-Mannosylglycerate 2	588	558.452	16.716,0	64	117	Class1	16.7175,0	602	1514039	Class1	16.7142,0	455	1.23989e+06	Class1	16.7133,0	498	1.01952e+06	Class1	16.7175,0	657	1.53938e+06	Class1	16.7142,0	559	1.29747e+06	Class1	16.7167,0	637	1.47485e+06	Class1	16.7033,0	596	465506	Class1	16.7142,0	567	1.54776e+06	Class2	16.7283,0	672	1.85673e+06	Class2	16.7125,0	595	462764	Class2	16.7325,0	581	1.51333e+06
glycocyamine 3	592	302.516	16.7806,0	33	295	Class1	16.7833,0	401	15285.9	Class1	16.7858,0	317	10392.7	Class1	16.7817,0	377	10295.2	Class1	16.7858,0	358	25573.6			0				0				0				0		Class2	16.7842,0	288	23333.8	Class2	16.7792,0	301	11802.4			0
4-aminobenzoic acid	593	353.509	16.7893,0	58	267	Class1	16.7925,0	0	1.49258e+06	Class1	16.7925,0	465	1.36026e+06	Class1	16.7917,0	328	1.12847e+06	Class1	16.7908,0	383	1.76886e+06	Class1	16.7908,0	360	1.46043e+06	Class1	16.7908,0	330	1.82605e+06	Class1	16.785,0	254	557771	Class1	16.7883,0	319	1.98887e+06	Class2	16.7967,0	347	670016	Class2	16.7883,0	225	183770	Class2	16.7958,0	380	1.11807e+06
unknown	600	508.621	16.8751,0	59	245	Class1	16.8783,0	591	1.18512e+06	Class1	16.875,0	633	836831	Class1	16.875,0	602	733590	Class1	16.8758,0	588	1.06918e+06	Class1	16.8742,0	692	874888	Class1	16.8742,0	635	1.1234e+06	Class1	16.8675,0	630	377536	Class1	16.8725,0	594	1.18352e+06	Class2	16.8767,0	576	1.42532e+06	Class2	16.87,0	569	302695			0
fructose 1	604	889.755	16.9386,0	53	262	Class1	16.9417,0	797	234972	Class1	16.9392,0	909	175046	Class1	16.9375,0	884	148332			0				0				0		Class1	16.9292,0	890	72128.6	Class1	16.9342,0	950	259710	Class2	16.9392,0	905	55465	Class2	16.9325,0	911	48571.3	Class2	16.9367,0	933	78859.5
Hippuric acid 2	608	782	17.0104,0	8	105	Class1	17.0217,0	787	1.61367e+07			0				0		Class1	16.9975,0	789	3.85359e+07	Class1	16.9958,0	916	2.19177e+07	Class1	17.0083,0	869	48158848	Class1	17.0733,0	437	8.19735e+06	Class1	16.99,0	643	49164420			0				0		Class2	16.9933,0	938	3.72364e+07
3,4-Dihydroxyphenylglycol	610	558	17.0361,0	44	355	Class1	17.0375,0	633	78555.7	Class1	17.0367,0	671	54989.9	Class1	17.0358,0	554	46156			0		Class1	17.0358,0	575	62774	Class1	17.0358,0	356	79672.5			0		Class1	17.035,0	662	84358.6			0		Class2	17.0333,0	353	14804.2	Class2	17.0367,0	600	232466
D-Altrose 1	618	599.333	17.1239,0	33	274	Class1	17.125,0	613	324225	Class1	17.1242,0	483	237608	Class1	17.1233,0	490	207944	Class1	17.1233,0	512	309518	Class1	17.1233,0	476	236130	Class1	17.1217,0	589	330148	Class1	17.1192,0	626	93482.1	Class1	17.1217,0	574	339722	Class2	17.125,0	618	229951	Class2	17.12,0	599	87439			0
Gluconic lactone 1	623	839.75	17.1667,0	16	220	Class1	17.1658,0	901	757807	Class1	17.1675,0	869	649379	Class1	17.1658,0	858	610848			0				0				0		Class1	17.16,0	913	239166			0		Class2	17.1717,0	940	3.01002e+06	Class2	17.1683,0	745	435248	Class2	17.1625,0	925	880613
D-Talose 1	629	936.8	17.2458,0	5	205			0		Class1	17.25,0	937	9.29655e+06	Class1	17.2475,0	925	8.24735e+06			0		Class1	17.2483,0	962	9.21545e+06			0		Class1	17.2358,0	899	4.99008e+06	Class1	17.2475,0	961	1.23359e+07			0				0				0
mannose 2	634	407.59	17.3004,0	39	179			0				0		Class1	17.3033,0	561	506138	Class1	17.3042,0	424	1.19561e+06	Class1	17.3025,0	669	838524			0		Class1	17.2992,0	347	473905			0		Class2	17.3083,0	677	1.24208e+06	Class2	17.3,0	230	990894			0
glucose 2	643	926.508	17.4344,0	60	160	Class1	17.4383,0	890	1.97521e+06	Class1	17.4358,0	964	1.40922e+06	Class1	17.435,0	960	1.20856e+06			0		Class1	17.4342,0	940	1.40748e+06			0		Class1	17.4275,0	935	616922			0		Class2	17.4408,0	947	4.56568e+06	Class2	17.4025,0	946	850305			0
4-hydroxyphenylpyruvate 1	644	247.375	17.4543,0	17	191	Class1	17.4558,0	206	6.17907e+06	Class1	17.455,0	303	2.11462e+06	Class1	17.4525,0	212	906576	Class1	17.4483,0	277	366668	Class1	17.4517,0	134	189907			0				0				0		Class2	17.4525,0	329	984078	Class2	17.4525,0	282	178809			0
tyramine	647	702.08	17.4788,0	25	174	Class1	17.475,0	751	463876			0		Class1	17.4733,0	780	242722	Class1	17.475,0	778	416431	Class1	17.4733,0	737	325703	Class1	17.4717,0	704	334874	Class1	17.4692,0	736	135636	Class1	17.47,0	793	363764	Class2	17.4783,0	673	947664	Class2	17.4742,0	697	232118	Class2	17.475,0	762	626999
histidine 2	649	285.864	17.5349,0	46	287	Class1	17.5292,0	162	46145.5	Class1	17.5292,0	162	36753.6	Class1	17.5275,0	188	31529.3	Class1	17.5275,0	113	48761.7	Class1	17.5258,0	195	43430.6	Class1	17.5258,0	165	50797.8	Class1	17.5208,0	97	12130.1	Class1	17.525,0	111	49513.5	Class2	17.5308,0	384	151037			0				0
mannitol	653	946	17.5735,0	8	319	Class1	17.5775,0	943	1.0338e+07	Class1	17.5758,0	962	8.73946e+06	Class1	17.5733,0	961	8.06376e+06	Class1	17.5767,0	941	1.06597e+07			0		Class1	17.5742,0	943	1.09686e+07	Class1	17.5633,0	916	4.807e+06	Class1	17.5708,0	947	1.14842e+07			0		Class2	17.5767,0	955	1.1529e+07			0
unknown	657	223	17.5987,0	15	107	Class1	17.6,0	251	93744.4			0		Class1	17.605,0	222	85982.7			0				0		Class1	17.5908,0	260	91173.9			0		Class1	17.5908,0	199	111283			0				0		Class2	17.5933,0	267	403983
D-galacturonic acid 1	658	828.482	17.6299,0	57	333			0		Class1	17.63,0	863	5.17622e+06	Class1	17.6292,0	854	4.47751e+06			0		Class1	17.6292,0	838	4.94128e+06	Class1	17.6292,0	551	6.75402e+06	Class1	17.6183,0	921	2.08401e+06	Class1	17.6275,0	644	7.22955e+06	Class2	17.6267,0	889	1.60229e+07	Class2	17.6233,0	861	1.83499e+06	Class2	17.625,0	870	8.44656e+06
sorbitol	661	840.412	17.6813,0	17	307	Class1	17.6825,0	853	258080	Class1	17.6817,0	845	230475	Class1	17.6792,0	854	186019	Class1	17.6817,0	864	277762	Class1	17.68,0	726	219469	Class1	17.6792,0	859	273927	Class1	17.6725,0	820	102721	Class1	17.6767,0	839	283350	Class2	17.6908,0	883	1.31001e+06	Class2	17.6792,0	897	244251	Class2	17.6792,0	866	527792
Gallic acid	666	298.4	17.748,0	61	179	Class1	17.7492,0	323	1.4434e+06	Class1	17.75,0	316	940571	Class1	17.7483,0	297	688138	Class1	17.7483,0	329	686914	Class1	17.7475,0	336	550962	Class1	17.745,0	289	532868	Class1	17.7458,0	333	189499	Class1	17.7433,0	302	558737	Class2	17.7508,0	318	175679	Class2	17.7475,0	326	128404	Class2	17.745,0	295	89062.1
D-galacturonic acid 1	668	800.885	17.7803,0	62	333	Class1	17.7808,0	802	902442	Class1	17.7808,0	721	670543	Class1	17.78,0	840	576713			0		Class1	17.7783,0	759	658879			0		Class1	17.7742,0	653	285233	Class1	17.7758,0	836	933825	Class2	17.7833,0	837	2.48431e+06	Class2	17.7767,0	854	243865	Class2	17.7783,0	805	290759
unknown	677	690.643	17.9108,0	30	292	Class1	17.9358,0	755	305083	Class1	17.935,0	744	233821	Class1	17.9342,0	724	205014	Class1	17.9342,0	756	285457	Class1	17.9325,0	750	225318			0		Class1	17.9275,0	749	106286			0		Class2	17.9033,0	642	332254	Class2	17.9267,0	648	106293	Class2	17.9317,0	738	404429
unknown	679	351.8	17.9534,0	10	358	Class1	17.9533,0	456	357622	Class1	17.955,0	451	265427	Class1	17.955,0	429	216660	Class1	17.9525,0	463	252165	Class1	17.9525,0	392	166713	Class1	17.9508,0	255	186469	Class1	17.9575,0	274	40497.3	Class1	17.95,0	209	116323	Class2	17.955,0	271	611191	Class2	17.9525,0	318	240159			0
indole-3-acetic acid	681	821.219	17.9938,0	66	202	Class1	17.9975,0	812	831723	Class1	17.9992,0	805	675378	Class1	17.9992,0	776	617302	Class1	17.9942,0	833	885391	Class1	17.995,0	831	713154			0		Class1	18.0083,0	762	301511	Class1	17.9875,0	884	927705	Class2	17.995,0	906	2.41122e+06	Class2	17.9992,0	507	856872	Class2	17.99,0	887	1.39759e+06
Analyte 1004	683	363	18.0006,0	6	281	Class1	18.0033,0	363	80107.7	Class1	18.0083,0	0	60049.7	Class1	18.0042,0	0	61656.3			0				0		Class1	17.9967,0	0	75728.7	Class1	17.9967,0	0	25203.3	Class1	17.9942,0	0	79152.7			0				0				0
Analyte 1005	684	194.875	18.0342,0	57	121	Class1	18.0367,0	295	87150.7	Class1	18.0383,0	237	69995.9	Class1	18.0375,0	276	68943.1	Class1	18.0342,0	0	78240.7	Class1	18.0342,0	199	65454.4			0		Class1	18.0425,0	0	26630.4	Class1	18.0275,0	214	82132.5	Class2	18.0358,0	0	314278	Class2	18.04,0	295	19367.4	Class2	18.0308,0	0	156290
Analyte 1007	686	260.125	18.0722,0	23	204	Class1	18.075,0	156	96897.6	Class1	18.075,0	0	59518.8	Class1	18.075,0	0	52162.5	Class1	18.075,0	0	49638.2	Class1	18.0733,0	0	70421.4			0		Class1	18.0692,0	0	38556.4	Class1	18.07,0	284	72775.1	Class2	18.0767,0	0	80140.8	Class2	18.0733,0	259	25312.4	Class2	18.0742,0	0	1.12956e+06
caffeic acid	691	732	18.1153,0	12	219	Class1	18.115,0	906	433890	Class1	18.1158,0	924	251313	Class1	18.1167,0	858	138290	Class1	18.1133,0	814	44383.5	Class1	18.1125,0	560	26206.5			0				0				0		Class2	18.115,0	776	81052.9	Class2	18.1175,0	735	27438.5			0
N-alpha-Acetyl-L-ornithine 1	692	449.468	18.1317,0	63	174	Class1	18.1367,0	446	255592	Class1	18.1383,0	369	187697	Class1	18.1375,0	421	134901	Class1	18.1358,0	388	160569	Class1	18.1358,0	465	117792	Class1	18.1333,0	415	105378	Class1	18.135,0	426	43463.3	Class1	18.1308,0	435	121236	Class2	18.135,0	364	297797	Class2	18.1325,0	428	143037	Class2	18.1342,0	451	262258
Analyte 1017	695	266.75	18.1502,0	32	288	Class1	18.1517,0	213	12587.8	Class1	18.1583,0	0	12157			0		Class1	18.1517,0	282	15135	Class1	18.1508,0	472	12229.3			0		Class1	18.145,0	0	6357.55	Class1	18.1475,0	426	14489.9			0		Class2	18.1517,0	0	4641.59	Class2	18.1525,0	324	29517.5
Galactonic acid	698	866.833	18.2051,0	12	319	Class1	18.2075,0	911	93213.3	Class1	18.2075,0	915	73990.2	Class1	18.2067,0	898	63763.2	Class1	18.2083,0	897	109916	Class1	18.2058,0	919	77909.7	Class1	18.2033,0	903	101889	Class1	18.2008,0	746	32182.2	Class1	18.2017,0	913	101177			0				0		Class2	18.2125,0	703	77384
pantothenic acid	700	785.571	18.2126,0	7	201	Class1	18.215,0	823	116164	Class1	18.215,0	764	94194.3	Class1	18.215,0	812	79687.1	Class1	18.2133,0	817	114140			0				0		Class1	18.2092,0	708	38383.9	Class1	18.2083,0	822	121726	Class2	18.2125,0	753	318829			0				0
gluconic acid 1	702	941.094	18.251,0	65	333	Class1	18.2567,0	945	1.8047e+06	Class1	18.2542,0	944	1.60621e+06	Class1	18.2533,0	940	1.4744e+06	Class1	18.2533,0	944	1.87697e+06	Class1	18.2517,0	888	1.53017e+06	Class1	18.2508,0	950	2.30308e+06	Class1	18.2458,0	945	593642			0		Class2	18.2567,0	925	3.73283e+06	Class2	18.2492,0	950	673904			0
glutamine 5	703	258.28	18.2839,0	25	212	Class1	18.2883,0	349	15183.3	Class1	18.2883,0	173	12561.7	Class1	18.2908,0	316	14718.5			0				0		Class1	18.2817,0	207	18787.1	Class1	18.2875,0	321	5370.15			0		Class2	18.2908,0	393	44004.5	Class2	18.2875,0	327	10902.3			0
Analyte 1034	704	184.462	18.31,0	25	186			0		Class1	18.315,0	253	19838	Class1	18.315,0	0	16129.9	Class1	18.3125,0	235	25835.1			0		Class1	18.3092,0	206	15776.3	Class1	18.3108,0	0	4047.76			0		Class2	18.3125,0	0	80688.9			0		Class2	18.3125,0	196	25490.2
Saccharic acid	705	894.588	18.3538,0	69	333	Class1	18.3575,0	900	361000	Class1	18.3575,0	893	287529	Class1	18.3567,0	749	257319	Class1	18.3558,0	876	344276	Class1	18.355,0	911	279120	Class1	18.3533,0	911	356189	Class1	18.35,0	854	128344	Class1	18.3517,0	925	368649	Class2	18.3575,0	924	552750	Class2	18.3533,0	870	115418	Class2	18.3558,0	924	584992
gluconic acid 1	706	804.354	18.38,0	67	205	Class1	18.3833,0	791	90915.9	Class1	18.3842,0	856	73270.9	Class1	18.3808,0	766	62103.5	Class1	18.3817,0	714	91810	Class1	18.3808,0	835	74707.4	Class1	18.3783,0	857	86482.2	Class1	18.3767,0	836	35154.9	Class1	18.3767,0	855	93400.5	Class2	18.3833,0	812	171224	Class2	18.4392,0	0	1571.34	Class2	18.3808,0	942	288192
Guanidinosuccinic acid 3	710	670.842	18.458,0	58	444	Class1	18.4633,0	325	18016.3	Class1	18.465,0	787	13654.3	Class1	18.4625,0	592	17501.3	Class1	18.4617,0	801	21245.6	Class1	18.46,0	755	19833.6	Class1	18.4567,0	824	24777.6	Class1	18.4575,0	595	9147.18	Class1	18.4567,0	787	22883.1	Class2	18.4608,0	684	50720.6	Class2	18.4567,0	407	10641.7			0
Analyte 1047	712	403	18.5198,0	67	318	Class1	18.5242,0	0	734559	Class1	18.525,0	0	604083	Class1	18.5242,0	0	545506	Class1	18.5225,0	0	744265	Class1	18.5217,0	0	602325	Class1	18.5192,0	0	786110	Class1	18.5167,0	0	304392	Class1	18.5167,0	0	825101	Class2	18.5242,0	0	1.70916e+06	Class2	18.5208,0	0	269332	Class2	18.5208,0	0	998671
beta-Hydroxymyristic acid	713	479.923	18.474,0	48	204	Class1	18.5267,0	0	464882	Class1	18.5292,0	0	381110			0		Class1	18.4742,0	433	63799.9	Class1	18.4725,0	0	73864.1	Class1	18.47,0	0	100228	Class1	18.4683,0	564	34150.3	Class1	18.4683,0	536	98831.7	Class2	18.4742,0	0	145909			0				0
xanthine	715	718.941	18.5471,0	17	353	Class1	18.5675,0	651	351690			0		Class1	18.5717,0	585	263680			0		Class1	18.5567,0	811	394109			0				0		Class1	18.555,0	896	457939	Class2	18.5342,0	573	966940	Class2	18.5617,0	694	165583			0
palmitoleic acid	717	252.25	18.6025,0	4	313	Class1	18.605,0	241	6001.03	Class1	18.6042,0	201	6592.23			0		Class1	18.6008,0	306	7244.55			0		Class1	18.6,0	261	8016.71			0				0				0				0				0
trans-3,5-Dimethoxy-4-hydroxycinnamaldehyde 2	719	280.071	18.6362,0	68	91	Class1	18.6408,0	0	917357	Class1	18.6425,0	314	962672	Class1	18.6492,0	0	651755	Class1	18.6392,0	0	604344	Class1	18.6442,0	0	292208	Class1	18.6383,0	0	401324			0		Class1	18.6308,0	0	331753	Class2	18.6308,0	325	3.14104e+06	Class2	18.6525,0	0	799767	Class2	18.6408,0	0	547045
N-Carbamylglutamate 4	721	404.514	18.6739,0	35	174	Class1	18.6667,0	396	98900.4			0		Class1	18.6692,0	378	72581.2	Class1	18.6642,0	428	85375.8			0		Class1	18.6625,0	400	68844.9	Class1	18.615,0	431	33852	Class1	18.66,0	437	80386.2	Class2	18.7117,0	451	82031.5			0				0
Analyte 1064	723	401.227	18.7394,0	44	111	Class1	18.745,0	442	63476.4	Class1	18.745,0	405	57583.3	Class1	18.7467,0	422	48978.6	Class1	18.7442,0	0	62995.2	Class1	18.7408,0	0	65069.5	Class1	18.74,0	0	61321.5	Class1	18.7408,0	0	24905.7	Class1	18.7358,0	379	63640.4	Class2	18.7442,0	0	164715			0				0
palmitic acid	724	841.317	18.7503,0	64	117	Class1	18.7525,0	927	514803	Class1	18.7542,0	928	411216	Class1	18.7525,0	853	347125	Class1	18.7483,0	909	537966	Class1	18.7483,0	860	898134	Class1	18.745,0	869	527003	Class1	18.7542,0	871	191401	Class1	18.7417,0	867	471776	Class2	18.75,0	964	1.73168e+06	Class2	18.7617,0	939	177693	Class2	18.7483,0	921	598664
Analyte 1068	726	261.515	18.7879,0	38	365	Class1	18.7925,0	259	18351.3	Class1	18.7933,0	360	12935.5	Class1	18.7942,0	159	13018	Class1	18.7908,0	179	15903.5			0				0				0				0		Class2	18.79,0	323	52768.1	Class2	18.7942,0	0	12584.6			0
mucic acid	727	636.589	18.7979,0	57	333	Class1	18.7983,0	546	20257.7	Class1	18.8,0	704	14427.5	Class1	18.7983,0	720	14503			0				0				0		Class1	18.795,0	725	7560.4	Class1	18.7933,0	687	23754.9			0		Class2	18.8008,0	543	5081.66	Class2	18.8017,0	643	20825.1
L-dopa 1	728	671.083	18.8462,0	67	267	Class1	18.8575,0	771	8.52044e+06	Class1	18.855,0	771	2.67796e+06	Class1	18.8517,0	771	1.05311e+06	Class1	18.8492,0	773	328889	Class1	18.8508,0	782	1.35441e+06	Class1	18.8458,0	694	66158.4	Class1	18.8442,0	0	52338.2	Class1	18.8425,0	0	75240.4	Class2	18.8483,0	737	546198	Class2	18.8475,0	783	167312	Class2	18.8475,0	681	35709.6
unknown	729	451.4	18.874,0	27	95			0		Class1	18.865,0	315	39704.4			0				0		Class1	18.875,0	282	31594.8			0		Class1	18.8733,0	0	8687.96	Class1	18.87,0	487	25973.2			0		Class2	18.9167,0	414	5780.68	Class2	18.8767,0	613	31491.9
N-Acetyl-beta-D-mannosamine 1	738	787.64	19.0151,0	26	87	Class1	19.0208,0	788	556398	Class1	19.02,0	576	445085	Class1	19.0192,0	636	386921	Class1	19.0175,0	675	515615	Class1	19.0183,0	626	407002	Class1	19.0142,0	606	481116	Class1	19.0142,0	694	163593	Class1	19.0117,0	803	504063	Class2	19.0192,0	802	2.49154e+06	Class2	19.0125,0	874	214461	Class2	19.0175,0	848	715750
4-oxo-1H-quinoline-2-carboxylic acid	740	444.739	19.0631,0	24	132	Class1	19.0642,0	438	91932.8			0		Class1	19.0642,0	413	63661.6	Class1	19.0617,0	555	91034.5	Class1	19.0617,0	409	72342.1	Class1	19.06,0	476	92735.6	Class1	19.0575,0	569	32762.6			0				0		Class2	19.0592,0	209	36688.3			0
myo-inositol	743	933.154	19.1159,0	66	217	Class1	19.1217,0	942	2.85533e+06	Class1	19.1217,0	943	2.25104e+06	Class1	19.1208,0	933	2.02217e+06	Class1	19.1192,0	950	2.90331e+06	Class1	19.1183,0	948	2.32229e+06			0		Class1	19.1125,0	944	1.0836e+06	Class1	19.1133,0	949	3.1965e+06	Class2	19.12,0	944	8.61409e+06	Class2	19.1158,0	870	588999	Class2	19.12,0	946	5.5211e+06
unknown	744	204.088	19.1265,0	41	365	Class1	19.13,0	313	102130			0				0		Class1	19.1275,0	88	84116.4			0				0		Class1	19.1292,0	164	24545.3	Class1	19.1217,0	0	72232.7			0		Class2	19.1292,0	26	64998.1			0
uric acid	750	900.033	19.2648,0	60	442	Class1	19.2625,0	930	9.63899e+06			0		Class1	19.255,0	919	7.55321e+06	Class1	19.265,0	903	1.09878e+07	Class1	19.2642,0	936	1.00185e+07	Class1	19.2642,0	912	1.13252e+07	Class1	19.2317,0	878	4.71912e+06	Class1	19.2575,0	847	1.07571e+07	Class2	19.2717,0	790	1.76844e+07	Class2	19.2533,0	857	1.09745e+07	Class2	19.2758,0	891	13327823
Analyte 1118	756	302.2	19.4025,0	12	293	Class1	19.4017,0	291	34519.5	Class1	19.4008,0	282	23770.1	Class1	19.4017,0	301	31402.3	Class1	19.4,0	0	31408.4	Class1	19.4025,0	0	13149.3			0				0				0		Class2	19.405,0	0	46100.5	Class2	19.4042,0	0	12287.3			0
unknown	762	687.5	19.488,0	18	319	Class1	19.4908,0	694	397469	Class1	19.49,0	695	308205	Class1	19.4892,0	713	262184	Class1	19.4892,0	686	398361	Class1	19.49,0	684	319264	Class1	19.4883,0	678	417765	Class1	19.48,0	675	150639	Class1	19.485,0	711	416289	Class2	19.4933,0	730	1.59154e+06	Class2	19.4867,0	684	120218	Class2	19.4908,0	699	192298
Glucoheptonic acid 3	765	690.159	19.5406,0	63	319	Class1	19.5442,0	719	498358	Class1	19.5442,0	707	389469	Class1	19.5425,0	698	341324	Class1	19.5433,0	713	505141	Class1	19.5425,0	694	395512	Class1	19.5408,0	595	537917	Class1	19.5325,0	686	192316	Class1	19.5383,0	679	526949	Class2	19.545,0	708	1.57115e+06	Class2	19.54,0	686	165639	Class2	19.5425,0	699	221970
3,4-dihydroxycinnamic acid	768	713.372	19.5959,0	43	219			0		Class1	19.6033,0	780	8.36742e+06	Class1	19.6008,0	956	4.84648e+06	Class1	19.5975,0	921	1.26284e+06	Class1	19.5983,0	897	571507	Class1	19.5942,0	546	88635.7	Class1	19.6025,0	446	22792.4			0				0		Class2	19.5975,0	911	786617			0
9-Phenanthrol	772	237.929	19.634,0	29	118	Class1	19.6358,0	212	623016	Class1	19.6367,0	214	358126	Class1	19.6383,0	252	280760	Class1	19.6325,0	257	329668	Class1	19.6283,0	0	366594	Class1	19.6242,0	239	369680	Class1	19.6633,0	251	67143.1			0		Class2	19.635,0	145	353604	Class2	19.6558,0	0	84067	Class2	19.6325,0	0	128311
Analyte 1150	774	338	19.7407,0	31	300	Class1	19.735,0	0	130730	Class1	19.7383,0	0	101017	Class1	19.7408,0	0	74599.1	Class1	19.7325,0	0	58737.1			0		Class1	19.7283,0	0	74476.4	Class1	19.76,0	0	24340.2	Class1	19.7242,0	0	90693.8	Class2	19.7342,0	0	159651	Class2	19.7617,0	0	35432.9	Class2	19.7425,0	360	34285.8
Analyte 1159	780	275.417	19.8049,0	68	193	Class1	19.8083,0	0	441785	Class1	19.8092,0	0	395487	Class1	19.81,0	0	400020	Class1	19.7983,0	0	605472	Class1	19.7992,0	0	479152	Class1	19.7925,0	0	733391	Class1	19.84,0	0	115645	Class1	19.7942,0	0	689752	Class2	19.805,0	0	384616	Class2	19.84,0	334	87542	Class2	19.8017,0	0	406779
Indolelactate 2	783	734.962	19.9097,0	54	202			0				0		Class1	19.9183,0	741	89993.9			0				0		Class1	19.91,0	794	126248	Class1	19.9142,0	781	49738.4	Class1	19.915,0	547	141986	Class2	19.9267,0	0	65083.1			0				0
Analyte 1171	785	293	19.9399,0	35	204	Class1	19.9442,0	0	112212	Class1	19.9442,0	0	93075.3			0		Class1	19.9408,0	0	108849	Class1	19.9408,0	0	84166.5	Class1	19.9367,0	0	115492	Class1	19.94,0	0	37918.3	Class1	19.935,0	0	117858	Class2	19.94,0	0	122297			0		Class2	19.9367,0	0	94429.9
Fructose 2,6-biphosphate degr prod 1	788	314	20.0465,0	27	357	Class1	20.0558,0	274	10946.8			0		Class1	20.0517,0	307	8281.08	Class1	20.0475,0	250	7364.19	Class1	20.05,0	0	8045.01	Class1	20.0458,0	291	7369.93	Class1	20.05,0	244	5670.24	Class1	20.0408,0	364	9442.93			0				0				0
Analyte 1178	790	0	20.0723,0	68	243	Class1	20.0775,0	0	185207	Class1	20.0775,0	0	132716	Class1	20.0767,0	0	120459	Class1	20.075,0	0	196768	Class1	20.075,0	0	303239	Class1	20.0717,0	0	347389	Class1	20.0725,0	0	197792	Class1	20.07,0	0	342782	Class2	20.075,0	0	152118	Class2	20.075,0	0	151494	Class2	20.0717,0	0	142779
Analyte 1184	794	452.714	20.2853,0	13	147	Class1	20.2033,0	0	607686	Class1	20.2042,0	412	345249	Class1	20.2025,0	403	175460			0		Class1	20.1967,0	0	132845			0				0				0				0		Class2	20.2067,0	436	47167.1			0
unknown	795	338.877	20.2721,0	58	202	Class1	20.2725,0	416	312699	Class1	20.2733,0	302	365128	Class1	20.2758,0	505	326385	Class1	20.2675,0	353	436035	Class1	20.2708,0	449	270158	Class1	20.2633,0	464	236886			0		Class1	20.2583,0	177	223528	Class2	20.28,0	236	2.51712e+06	Class2	20.2742,0	172	425872	Class2	20.2692,0	365	262115
5-Hydroxyindole-3-acetic acid 1	796	838.147	20.2744,0	69	290	Class1	20.2783,0	852	306083	Class1	20.28,0	918	256252	Class1	20.28,0	844	222848	Class1	20.275,0	849	316566	Class1	20.2758,0	790	236614	Class1	20.2725,0	899	323205	Class1	20.2792,0	810	100891	Class1	20.2708,0	828	316584	Class2	20.2883,0	620	353662	Class2	20.2792,0	860	165437	Class2	20.2725,0	946	448185
6-Aminopenicillanic acid 2	801	289.226	20.3811,0	48	234	Class1	20.4225,0	0	55510.4	Class1	20.4142,0	0	51611.8	Class1	20.4183,0	48	51178.4	Class1	20.3867,0	0	110332	Class1	20.3975,0	195	97022.5	Class1	20.3825,0	221	166401			0		Class1	20.3842,0	0	138921	Class2	20.3692,0	242	110110			0				0
Analyte 1201	802	340.875	20.4576,0	69	70	Class1	20.46,0	0	5.06176e+06	Class1	20.4617,0	0	4.4039e+06	Class1	20.4642,0	0	4.128e+06	Class1	20.4517,0	0	5.52672e+06	Class1	20.4542,0	0	4.33571e+06	Class1	20.4475,0	0	4.92455e+06	Class1	20.4992,0	0	1.4268e+06	Class1	20.4475,0	0	5.17856e+06	Class2	20.4592,0	0	2.72205e+06	Class2	20.4933,0	0	2.05648e+06	Class2	20.4525,0	0	4.14002e+06
stearic acid	803	888.704	20.5262,0	27	117	Class1	20.5283,0	754	713093	Class1	20.53,0	849	587995	Class1	20.5292,0	703	539874	Class1	20.525,0	953	792988	Class1	20.525,0	962	1.31281e+06	Class1	20.5217,0	966	766512	Class1	20.53,0	850	245160	Class1	20.5175,0	954	735272	Class2	20.5283,0	949	1.16773e+06	Class2	20.5367,0	920	285929	Class2	20.525,0	954	717440
Analyte 1204	804	342.5	20.5214,0	68	193	Class1	20.5442,0	0	756459	Class1	20.5342,0	0	759162	Class1	20.5475,0	0	774131	Class1	20.5175,0	407	1.17226e+06	Class1	20.5208,0	342	907682	Class1	20.5125,0	0	1.35577e+06	Class1	20.5867,0	0	144402	Class1	20.5117,0	0	1.28282e+06	Class2	20.5233,0	0	717392	Class2	20.5658,0	0	378291	Class2	20.5167,0	0	1.19164e+06
xanthurenic acid	807	637.485	20.6816,0	66	406	Class1	20.6933,0	406	13722.3			0		Class1	20.6975,0	362	13182.7	Class1	20.6875,0	456	27358.9	Class1	20.6892,0	711	22423.5	Class1	20.6842,0	568	24844.9			0		Class1	20.6867,0	473	25687.5	Class2	20.6825,0	694	42689.5	Class2	20.6892,0	567	17801.6	Class2	20.6808,0	649	43491.2
Analyte 1214	808	289.6	20.7049,0	52	129	Class1	20.7167,0	0	192106	Class1	20.7183,0	0	146016	Class1	20.7158,0	0	128944	Class1	20.7142,0	0	170439	Class1	20.7142,0	0	135633	Class1	20.71,0	0	161504	Class1	20.7108,0	0	60887.4	Class1	20.7075,0	0	169889	Class2	20.7117,0	0	9106.07			0		Class2	20.7092,0	0	119935
unknown	810	315.906	20.7956,0	67	221	Class1	20.7983,0	196	37594	Class1	20.7983,0	334	40404.7	Class1	20.7992,0	382	43810.5	Class1	20.7983,0	365	58408.1	Class1	20.7983,0	262	129852	Class1	20.795,0	259	74941.4	Class1	20.7942,0	315	43936.8	Class1	20.7917,0	389	85602	Class2	20.7992,0	385	191886	Class2	20.8,0	259	44243.4	Class2	20.795,0	0	84570.9
cystine	811	545.833	20.8769,0	56	73	Class1	20.8808,0	0	1.24265e+06	Class1	20.8825,0	0	989106	Class1	20.8825,0	0	849599	Class1	20.7792,0	601	1.2344e+06	Class1	20.7858,0	632	1.50124e+06			0		Class1	20.7817,0	643	799116	Class1	20.775,0	0	1.68472e+06	Class2	20.9158,0	0	9.6514e+06	Class2	20.7792,0	432	389561	Class2	20.7717,0	0	1.16466e+06
Phenyl beta-D-glucopyranoside	815	526.667	21.0495,0	68	204	Class1	21.055,0	0	1.37391e+06	Class1	21.055,0	0	1.08865e+06	Class1	21.0542,0	0	963976	Class1	21.0517,0	0	1.26839e+06	Class1	21.0525,0	0	1.00042e+06	Class1	21.0492,0	0	1.2295e+06	Class1	21.0475,0	0	421172	Class1	21.0467,0	0	1.277e+06	Class2	21.0542,0	0	8.1075e+06	Class2	21.0517,0	0	889379	Class2	21.0483,0	0	614414
Analyte 1233	820	469	21.2473,0	63	217			0		Class1	21.2517,0	0	1.46269e+07	Class1	21.2492,0	0	1.26915e+07	Class1	21.2508,0	0	1.65385e+07	Class1	21.2492,0	0	1.23118e+07	Class1	21.2475,0	462	1.78659e+07	Class1	21.2383,0	0	1.67859e+06	Class1	21.2442,0	0	1.59993e+07			0		Class2	21.2442,0	0	5.40806e+06	Class2	21.2492,0	472	2.12284e+07
Analyte 1237	824	236.455	21.311,0	42	174	Class1	21.3158,0	0	256807	Class1	21.315,0	0	206135			0		Class1	21.3125,0	0	216309	Class1	21.3125,0	0	175417	Class1	21.3092,0	0	147328	Class1	21.3075,0	83	46824.8	Class1	21.3058,0	0	193860			0		Class2	21.3117,0	0	81752.2	Class2	21.3083,0	0	263013
Analyte 1242	828	0	21.4103,0	56	169	Class1	21.4167,0	0	302460	Class1	21.4158,0	0	244690	Class1	21.4142,0	0	220485	Class1	21.4133,0	0	287218	Class1	21.4142,0	0	207447	Class1	21.41,0	0	262825	Class1	21.4092,0	0	78967.6	Class1	21.4075,0	0	261675	Class2	21.4217,0	0	1.2013e+07	Class2	21.4133,0	0	206701	Class2	21.4108,0	0	570131
Analyte 1243	829	0	21.4253,0	62	204	Class1	21.4308,0	0	269693	Class1	21.4317,0	0	216056	Class1	21.4292,0	0	193801			0		Class1	21.4292,0	0	192931	Class1	21.4233,0	0	244055	Class1	21.4217,0	0	83738.3	Class1	21.4233,0	0	243277	Class2	21.4267,0	0	2.79825e+06	Class2	21.4292,0	0	106033	Class2	21.4158,0	0	428456
unknown	831	558.083	21.5409,0	37	103	Class1	21.5483,0	604	133902	Class1	21.5475,0	0	110176	Class1	21.5458,0	0	90900.7	Class1	21.5442,0	0	125122	Class1	21.5458,0	0	97803.8			0		Class1	21.5375,0	0	38270	Class1	21.5375,0	516	111962	Class2	21.5467,0	630	578981	Class2	21.5442,0	0	51983.1			0
pyridoxal phosphate 2	832	275.933	21.5509,0	48	250	Class1	21.5575,0	113	20311.5	Class1	21.5567,0	146	20406.8	Class1	21.5542,0	0	16699			0				0		Class1	21.55,0	212	19986	Class1	21.5533,0	0	9208.56	Class1	21.5475,0	0	20240.3	Class2	21.5542,0	350	202537	Class2	21.5575,0	0	11729.4	Class2	21.5483,0	25	18948
Analyte 1250	833	175.864	21.591,0	29	243	Class1	21.5933,0	174	82604.2	Class1	21.5942,0	248	41404.2	Class1	21.5933,0	179	44792.7	Class1	21.5892,0	223	73425.4	Class1	21.59,0	202	35738.5			0				0				0		Class2	21.5942,0	159	233526	Class2	21.5958,0	269	19178.6	Class2	21.5892,0	41	12707.1
Purine riboside	834	649.933	21.647,0	69	262	Class1	21.6542,0	653	60687.7	Class1	21.6533,0	0	42869.7	Class1	21.65,0	0	41180.1	Class1	21.65,0	0	48672.2	Class1	21.6508,0	0	40694.4	Class1	21.6467,0	664	51823.8	Class1	21.6442,0	0	18649.1	Class1	21.645,0	0	49648.6	Class2	21.6508,0	0	304140	Class2	21.6483,0	0	14420	Class2	21.6458,0	0	39666.4
Analyte 1252	835	619.704	21.6879,0	55	146	Class1	21.6925,0	636	18378.2	Class1	21.6942,0	0	17170.1	Class1	21.6942,0	617	13720.2	Class1	21.6958,0	0	13998.9			0		Class1	21.6925,0	0	16289.9	Class1	21.6883,0	652	5247.86			0		Class2	21.6883,0	0	121640			0		Class2	21.69,0	0	11583.6
unknown	836	577.969	21.6954,0	68	246	Class1	21.7033,0	546	322014	Class1	21.7025,0	575	253228	Class1	21.7,0	573	201837	Class1	21.6983,0	481	241047	Class1	21.6992,0	608	207044	Class1	21.6958,0	556	237351	Class1	21.6925,0	579	95050.8	Class1	21.6942,0	606	273118	Class2	21.6992,0	565	924143	Class2	21.6958,0	654	75358.3	Class2	21.6933,0	543	124751
unknown	837	495.136	21.7196,0	51	97	Class1	21.7242,0	591	70479.1	Class1	21.7267,0	0	47988.2			0		Class1	21.7217,0	0	63726.3	Class1	21.7208,0	0	61726.6	Class1	21.7192,0	437	83809.3			0		Class1	21.7142,0	0	65046.5	Class2	21.725,0	636	190931	Class2	21.7275,0	298	9872.43			0
unknown	838	230.059	21.7459,0	57	258			0		Class1	21.7633,0	0	18634.1	Class1	21.7675,0	0	12133.7	Class1	21.7583,0	250	18225.9	Class1	21.7683,0	0	16005.2	Class1	21.7592,0	0	24376.2			0				0		Class2	21.745,0	188	201540	Class2	21.7708,0	0	5972.09	Class2	21.7442,0	282	22543.8
tetracosane	839	187.5	21.7728,0	5	56			0				0		Class1	21.7783,0	66	16252.4			0		Class1	21.7742,0	309	61952.6	Class1	21.7683,0	0	67300.8			0		Class1	21.7633,0	0	71395.7			0				0				0
Analyte 1258	841	234	21.8054,0	66	103	Class1	21.81,0	0	191473	Class1	21.81,0	0	153725	Class1	21.8083,0	0	138570	Class1	21.8067,0	0	177415	Class1	21.8067,0	0	141340	Class1	21.8033,0	0	165489	Class1	21.8025,0	0	58446.7	Class1	21.8017,0	0	165919	Class2	21.8083,0	0	959948	Class2	21.8058,0	0	68036.3	Class2	21.8033,0	0	145130
Analyte 1261	842	0	21.8755,0	69	217	Class1	21.8892,0	0	818675	Class1	21.8875,0	0	674835	Class1	21.8883,0	0	668795	Class1	21.8825,0	0	1.08166e+06	Class1	21.8842,0	0	962725	Class1	21.88,0	0	1.35869e+06	Class1	21.8992,0	0	217474	Class1	21.8825,0	0	1.21469e+06	Class2	21.8717,0	0	5.64838e+06	Class2	21.8875,0	0	367612	Class2	21.8758,0	0	1.93974e+06
Analyte 1263	844	303.143	21.9343,0	60	221	Class1	21.9392,0	0	38881.6	Class1	21.9383,0	0	35562.7	Class1	21.9383,0	0	46544.9	Class1	21.9358,0	0	61354.4	Class1	21.9367,0	0	134328	Class1	21.9342,0	0	63902.9	Class1	21.9308,0	0	32292.3	Class1	21.9308,0	275	70896.6	Class2	21.9383,0	0	275715	Class2	21.9358,0	0	43905.8	Class2	21.9342,0	0	85016
thymidine 3	845	322.222	21.949,0	24	81	Class1	21.9525,0	301	30189.2	Class1	21.955,0	0	25800.3	Class1	21.9517,0	0	21083.2			0		Class1	21.9525,0	0	29461.5	Class1	21.9508,0	209	25354.3			0		Class1	21.945,0	0	22222.3	Class2	21.95,0	389	35139.3			0				0
Analyte 1268	846	373.167	22.0215,0	63	73	Class1	22.0267,0	0	4.22236e+06	Class1	22.0267,0	0	3.47155e+06	Class1	22.0242,0	0	3.02189e+06	Class1	22.0233,0	0	3.96148e+06	Class1	22.0258,0	0	2.80871e+06	Class1	22.0208,0	0	3.27916e+06	Class1	22.0192,0	0	920067	Class1	22.0183,0	0	3.06991e+06	Class2	22.025,0	0	2.47595e+07	Class2	22.0242,0	0	2.66514e+06	Class2	22.0192,0	0	854852
D-erythro-sphingosine 1	850	569.692	22.1272,0	33	204	Class1	22.1408,0	550	99562.1	Class1	22.1408,0	623	76223.3	Class1	22.1367,0	0	71940.4	Class1	22.1367,0	630	80779.6	Class1	22.1358,0	554	58229.4	Class1	22.1325,0	513	84659.7	Class1	22.1267,0	0	27157.7	Class1	22.13,0	629	76085.2	Class2	22.1308,0	528	237231	Class2	22.1275,0	593	21932.7	Class2	22.13,0	594	100549
unknown	851	495.641	22.1874,0	51	159			0		Class1	22.1442,0	0	0	Class1	22.1425,0	0	1738.64			0		Class1	22.1425,0	429	911.875			0		Class1	22.1358,0	0	2174.8			0		Class2	22.1983,0	0	181049	Class2	22.2,0	483	18415.8	Class2	22.1375,0	471	95.112
uridine 1	853	442.562	22.2483,0	69	285	Class1	22.2575,0	313	530465	Class1	22.2558,0	487	427072	Class1	22.2533,0	450	353743	Class1	22.2533,0	441	433685	Class1	22.2533,0	342	341159	Class1	22.2508,0	427	421378	Class1	22.2508,0	0	116078	Class1	22.2483,0	518	409046	Class2	22.2508,0	465	743318	Class2	22.25,0	500	167841	Class2	22.2492,0	479	491115
cytidine-monophosphate degr prod	856	629.067	22.3785,0	18	204	Class1	22.3933,0	706	132727	Class1	22.3933,0	529	103126	Class1	22.3858,0	0	70913.6			0		Class1	22.3908,0	701	126754	Class1	22.3892,0	572	204631	Class1	22.3833,0	677	102277	Class1	22.3842,0	662	207198			0		Class2	22.3892,0	732	83986.7	Class2	22.3467,0	471	43547.2
salicin	860	489.41	22.5025,0	58	259	Class1	22.555,0	460	1570.34			0				0		Class1	22.5517,0	590	3186.81	Class1	22.5525,0	587	5803.36	Class1	22.4975,0	542	25670.9	Class1	22.5458,0	616	2549.91	Class1	22.5467,0	452	2867.97			0		Class2	22.5525,0	436	2597.74	Class2	22.4967,0	371	51598.1
2-Monopalmitin	866	410.125	22.9165,0	39	305	Class1	22.9233,0	0	12784			0				0		Class1	22.9208,0	0	10570.3	Class1	22.9175,0	0	11786.4	Class1	22.9142,0	461	25945.1	Class1	22.9075,0	0	13768.6	Class1	22.9108,0	0	27106.4	Class2	22.9225,0	569	7440.95			0		Class2	22.915,0	0	7186.33
Analyte 1300	867	482.85	22.9816,0	53	204	Class1	22.9558,0	0	98372.8	Class1	22.955,0	0	90998.4	Class1	22.9533,0	0	69588.4	Class1	23.0283,0	0	70200.1	Class1	22.9525,0	0	101503	Class1	22.95,0	0	134600	Class1	22.945,0	670	87253	Class1	22.945,0	387	110916	Class2	22.955,0	0	93392.2	Class2	22.95,0	0	55418.4			0
Analyte 1304	870	0	22.9998,0	13	221	Class1	23.0025,0	0	36747.5	Class1	23.0033,0	0	32117.9	Class1	23.0017,0	0	45151.4			0		Class1	23.0033,0	0	120927	Class1	23,0	0	58640.6	Class1	22.9983,0	0	21750	Class1	22.9958,0	0	56704.7	Class2	23.0017,0	0	102343	Class2	23.0017,0	0	38886.3	Class2	22.9975,0	0	74382.1
Analyte 1309	874	0	23.1045,0	69	290	Class1	23.1108,0	0	77900.2	Class1	23.1108,0	0	75430	Class1	23.1083,0	0	62645.2	Class1	23.1067,0	0	94034.1	Class1	23.1092,0	0	47781.2	Class1	23.1042,0	0	79693	Class1	23.1017,0	0	9300.78	Class1	23.1,0	0	53611.4	Class2	23.1092,0	0	224710	Class2	23.1058,0	0	31907.6	Class2	23.1033,0	0	87305.2
inosine	875	267.75	23.1448,0	5	317	Class1	23.1483,0	267	51218.5	Class1	23.1467,0	289	38184.4	Class1	23.1442,0	266	32107.7			0				0				0		Class1	23.1375,0	0	9141.92			0				0		Class2	23.1475,0	249	6228.15			0
Analyte 1322	879	530	23.3468,0	62	204	Class1	23.355,0	0	426658	Class1	23.355,0	0	341962	Class1	23.3533,0	0	304846	Class1	23.3517,0	0	392636	Class1	23.3525,0	0	285050	Class1	23.3492,0	0	356368	Class1	23.3442,0	0	104818	Class1	23.3442,0	0	329274	Class2	23.3542,0	0	753805	Class2	23.35,0	0	132356	Class2	23.3483,0	0	332469
Analyte 1328	882	554.636	23.5066,0	54	246	Class1	23.5142,0	354	65309	Class1	23.5133,0	601	57074.5	Class1	23.51,0	580	66092.6	Class1	23.5117,0	605	89504.1	Class1	23.5117,0	617	28926	Class1	23.5092,0	574	65812.9	Class1	23.415,0	0	259.683			0		Class2	23.5108,0	486	280397	Class2	23.5133,0	492	62042.8	Class2	23.5092,0	0	193552
Analyte 1332	884	392.333	23.5482,0	20	259	Class1	23.5533,0	0	886376	Class1	23.5533,0	0	713856	Class1	23.5508,0	0	617488	Class1	23.5508,0	0	811293	Class1	23.5542,0	429	674353	Class1	23.5475,0	0	676621	Class1	23.54,0	0	195491	Class1	23.5425,0	0	619526	Class2	23.5533,0	0	1.23885e+06	Class2	23.5458,0	0	270461	Class2	23.545,0	0	504028
sucrose	887	874.197	23.58,0	67	361	Class1	23.5875,0	902	2.19914e+06	Class1	23.5867,0	935	1.64614e+06	Class1	23.5842,0	932	1.37601e+06	Class1	23.585,0	917	1.8676e+06	Class1	23.5883,0	943	5.43715e+06	Class1	23.5808,0	931	1.64621e+06	Class1	23.5733,0	937	503937	Class1	23.5758,0	928	1.50527e+06	Class2	23.5858,0	838	3.29523e+06	Class2	23.5775,0	878	154671			0
unknown	888	475.86	23.6383,0	51	236	Class1	23.6467,0	546	53683.5	Class1	23.6433,0	455	43069.6	Class1	23.6425,0	350	33902.7	Class1	23.6408,0	527	52330.4	Class1	23.6417,0	597	36750.6	Class1	23.6392,0	597	41735	Class1	23.6283,0	112	428.993	Class1	23.6358,0	569	40679	Class2	23.64,0	393	76186.8	Class2	23.645,0	432	16133.6			0
Analyte 1338	889	576	23.8385,0	60	259	Class1	23.845,0	0	146247	Class1	23.8458,0	0	106943	Class1	23.845,0	0	103289			0		Class1	23.8442,0	0	92142.2			0		Class1	23.83,0	0	34595.9			0		Class2	23.8417,0	0	198243	Class2	23.8317,0	0	47748.7	Class2	23.8358,0	0	80823.3
lactose 2	897	918.818	24.0045,0	22	103	Class1	24.0117,0	824	34913419	Class1	23.9708,0	947	3.97221e+06	Class1	24.0125,0	905	2.77966e+07	Class1	24.0167,0	909	3.38813e+07	Class1	24.0183,0	926	2.82315e+07	Class1	24.0158,0	912	3.086e+07	Class1	23.9858,0	927	1.54445e+07	Class1	24.0067,0	937	3.09848e+07	Class2	23.995,0	949	2.90229e+07	Class2	24.02,0	911	3.08364e+07	Class2	24.0042,0	941	2.44935e+07
cellobiose 1	899	923.119	24.1106,0	68	361	Class1	24.1242,0	923	9.18661e+06	Class1	24.12,0	922	1.10879e+07	Class1	24.115,0	920	1.07034e+07	Class1	24.1217,0	922	1.08064e+07	Class1	24.1167,0	921	1.05792e+07	Class1	24.1142,0	922	1.14989e+07	Class1	24.0942,0	913	2.83597e+06	Class1	24.1083,0	928	9.22601e+06	Class2	24.1133,0	924	9.43842e+06	Class2	24.12,0	921	1.16457e+07	Class2	24.1058,0	925	6.29984e+06
unknown	901	774.778	24.2302,0	64	204	Class1	24.2433,0	807	895460	Class1	24.2408,0	760	698376	Class1	24.2383,0	784	436709	Class1	24.2383,0	806	691359	Class1	24.24,0	735	852336			0		Class1	24.235,0	798	783533	Class1	24.2325,0	802	903817	Class2	24.2392,0	771	419390	Class2	24.2383,0	880	725994	Class2	24.2342,0	733	281336
11-beta-prostaglandin-F-2-alpha 1	903	243.846	24.2724,0	34	223	Class1	24.2775,0	0	43228.8	Class1	24.2758,0	0	34662.6	Class1	24.275,0	0	19274.7	Class1	24.2733,0	0	33715.4			0		Class1	24.2725,0	0	18597.2			0		Class1	24.2692,0	246	17353.9	Class2	24.2758,0	177	18434.9			0		Class2	24.2708,0	0	7547.63
unknown	904	555.625	24.3022,0	8	319	Class1	24.3133,0	638	35454.4	Class1	24.3125,0	518	28132.6	Class1	24.31,0	607	24179.2	Class1	24.2467,0	377	26054.3	Class1	24.3125,0	667	31252.8			0		Class1	24.3108,0	445	7337.24	Class1	24.3042,0	484	31816.1			0				0				0
unknown	909	675.2	24.4166,0	15	361			0		Class1	24.42,0	660	70881.3	Class1	24.4317,0	696	62783.4	Class1	24.4217,0	508	65421.5	Class1	24.4242,0	647	47638	Class1	24.4117,0	782	83050.7	Class1	24.4192,0	441	16691.7	Class1	24.425,0	758	23071.8			0		Class2	24.3717,0	686	47639.3			0
Lactobionic Acid 1	913	761.439	24.6107,0	67	204	Class1	24.6183,0	729	1.63513e+06	Class1	24.6175,0	779	1.35365e+06	Class1	24.615,0	774	1.21143e+06	Class1	24.6133,0	779	1.47068e+06	Class1	24.615,0	772	1.08796e+06	Class1	24.6117,0	783	1.33335e+06	Class1	24.6092,0	790	384257	Class1	24.6083,0	773	1.15478e+06	Class2	24.6158,0	752	1.702e+06	Class2	24.6125,0	737	532080	Class2	24.6117,0	799	2.25705e+06
Sophorose 2	917	628.8	24.6433,0	35	375	Class1	24.7542,0	717	86015.2	Class1	24.7542,0	698	65627	Class1	24.7508,0	680	64236.9	Class1	24.7508,0	693	73781.7	Class1	24.755,0	398	51289.5	Class1	24.7517,0	697	55042.2	Class1	24.7592,0	575	14861.8	Class1	24.7483,0	677	45841.5			0		Class2	24.6717,0	853	379.688	Class2	24.6967,0	718	1765.07
5'-methylthioadenosine 1	918	701.8	24.7927,0	66	236	Class1	24.7983,0	778	67016.1	Class1	24.7967,0	831	59033.2	Class1	24.7967,0	692	50394.6	Class1	24.795,0	669	55109.8	Class1	24.8017,0	445	25305.2	Class1	24.7958,0	511	25509.5			0		Class1	24.7942,0	435	18109.8	Class2	24.7917,0	817	116758	Class2	24.8033,0	713	26722.9	Class2	24.7908,0	813	67560.2
Analyte 1396	920	265.333	24.9319,0	22	221	Class1	24.9283,0	231	48790.8	Class1	24.9275,0	0	49769.5			0		Class1	24.9283,0	0	42511.9	Class1	24.9367,0	166	67337.9	Class1	24.9342,0	182	45009			0				0				0		Class2	24.935,0	0	40432.2	Class2	24.9258,0	348	84693.7
Gentiobiose 2	924	723.179	25.0148,0	28	204	Class1	25.0275,0	810	187923	Class1	25.0283,0	822	155048	Class1	25.0267,0	739	144030	Class1	25.025,0	739	172109	Class1	25.0275,0	824	115058	Class1	25.0242,0	787	139900	Class1	25.0333,0	837	38101.9	Class1	25.0217,0	858	112446	Class2	25.0275,0	877	464420	Class2	25.0283,0	917	185526	Class2	24.945,0	263	4813.47
naringenin 2	927	365.667	25.0819,0	9	117	Class1	25.0892,0	494	15063.3	Class1	25.09,0	340	10596.2	Class1	25.0867,0	479	14908.6	Class1	25.0867,0	318	24865.6	Class1	25.0917,0	164	18221	Class1	25.085,0	502	17768.1			0		Class1	25.0842,0	250	4931.81			0				0				0
Palatinose	928	399.167	25.1578,0	44	277	Class1	25.1617,0	360	46188.5	Class1	25.1617,0	391	41080.2			0				0				0		Class1	25.1592,0	150	23467			0		Class1	25.1567,0	240	16056.9	Class2	25.1583,0	308	93749.1	Class2	25.1608,0	400	32997	Class2	25.1583,0	0	29517.2
Isomaltose 1	932	753.448	25.2518,0	58	361	Class1	25.2633,0	801	67200.2	Class1	25.2633,0	936	56778.9	Class1	25.2608,0	803	39541	Class1	25.26,0	908	53334.3	Class1	25.2167,0	741	16546.4	Class1	25.2592,0	936	39639.9	Class1	25.2725,0	683	12728.8	Class1	25.2567,0	775	42332.4			0		Class2	25.2158,0	693	6701.99	Class2	25.26,0	796	44234.7
(+/-)-Taxifolin	943	334.1	25.8159,0	62	221	Class1	25.805,0	409	37576.4	Class1	25.805,0	0	33916.6	Class1	25.8033,0	407	38505.4	Class1	25.8092,0	355	26046	Class1	25.8133,0	0	43662.4	Class1	25.8175,0	259	24078.7			0		Class1	25.835,0	338	20631.2	Class2	25.8067,0	386	45778.1	Class2	25.8183,0	0	22866.6	Class2	25.8083,0	410	54370.6
Analyte 1428	944	586	25.9072,0	62	204	Class1	25.9125,0	0	104967	Class1	25.9117,0	0	86637.5	Class1	25.9108,0	0	71216.7	Class1	25.9083,0	0	88242.8	Class1	25.9133,0	0	67055.3	Class1	25.9125,0	0	110602	Class1	25.9317,0	0	18146.2	Class1	25.91,0	0	57547.7	Class2	25.9108,0	0	121092	Class2	25.9117,0	0	40565.4	Class2	25.9083,0	0	90650.7
Analyte 1439	952	384.667	26.169,0	13	73	Class1	26.18,0	0	6.5638e+06	Class1	26.1808,0	0	4.18517e+06	Class1	26.1783,0	280	3.26132e+06	Class1	26.1758,0	189	715973	Class1	26.185,0	303	253754	Class1	26.1808,0	473	129443			0		Class1	26.1825,0	0	83691.6	Class2	26.1767,0	558	1.59529e+06	Class2	26.1817,0	473	435984			0
Analyte 1451	959	0	26.6683,0	22	147			0				0		Class1	26.5642,0	0	12684.1			0		Class1	26.6325,0	0	65212.4	Class1	26.6408,0	0	53739.4			0		Class1	26.7242,0	0	446875			0		Class2	26.5692,0	0	2956.94			0
Analyte 1453	960	432.5	26.643,0	5	221	Class1	26.6317,0	0	31547.8	Class1	26.6425,0	0	36319.9	Class1	26.6458,0	492	36239.4			0				0		Class1	26.6467,0	373	18467.5			0				0				0		Class2	26.6483,0	0	23684.2			0
Analyte 1456	962	359	26.8077,0	8	229	Class1	26.8025,0	0	38221.3	Class1	26.8017,0	0	33508.2	Class1	26.8025,0	0	27814.8			0				0		Class1	26.8058,0	393	16806.9			0		Class1	26.81,0	325	8856.89	Class2	26.8067,0	0	34085.2	Class2	26.815,0	0	13488			0
3,7,12-Trihydroxycoprostane 1	971	402.455	27.303,0	38	129	Class1	27.2983,0	306	37132.9	Class1	27.2933,0	290	22421.9	Class1	27.3067,0	535	16101.7	Class1	27.3025,0	477	14703.3	Class1	27.3042,0	270	18200.7			0				0		Class1	27.3075,0	364	9455.31	Class2	27.2983,0	615	73579.6			0		Class2	27.31,0	483	15828.3
Analyte 1477	976	361	27.7379,0	53	73	Class1	27.7342,0	0	1.16459e+06	Class1	27.735,0	0	225103	Class1	27.735,0	0	129097			0		Class1	27.7367,0	0	84801.4	Class1	27.735,0	0	84336.8			0		Class1	27.7408,0	0	55809.6	Class2	27.7342,0	0	313322	Class2	27.74,0	0	54696.3	Class2	27.7308,0	0	81617.5
Analyte 1482	978	335.333	27.8642,0	6	259	Class1	27.86,0	373	16367.3	Class1	27.8642,0	0	12065.5	Class1	27.8608,0	0	9867.34			0				0		Class1	27.8667,0	0	8531.29			0		Class1	27.875,0	262	5359.02			0				0				0
Analyte 1486	981	0	28.0035,0	11	204	Class1	28.0692,0	0	26078	Class1	28.0025,0	0	28078.8	Class1	28.0033,0	0	19633.5			0				0		Class1	28.0058,0	0	20293			0		Class1	28.0167,0	0	8543.73			0		Class2	27.9067,0	0	33045.2	Class2	28,0	0	27466.3
Analyte 1501	987	679	28.9924,0	23	73	Class1	28.9542,0	0	186644	Class1	28.9567,0	0	134921	Class1	28.955,0	0	117985			0				0		Class1	28.9592,0	0	92888.7			0		Class1	29.0517,0	800	1.76215e+06			0		Class2	29.1,0	0	92320.4	Class2	28.9525,0	0	54610.5
maltotriose 1	991	473.8	29.6028,0	56	204	Class1	29.5992,0	0	132308	Class1	29.6017,0	0	105709	Class1	29.6017,0	0	91099	Class1	29.6092,0	0	44782.4			0		Class1	29.6067,0	0	61711.9			0		Class1	29.6283,0	341	12566.8			0				0		Class2	29.5925,0	0	78328.9
Analyte 1526	1002	0	31.8952,0	11	73	Class1	31.9083,0	0	4.64999e+06	Class1	31.8908,0	0	988525			0				0		Class1	31.8033,0	0	68525.7	Class1	31.915,0	0	29574.9			0				0				0		Class2	31.9042,0	0	20329.1			0
[truncated: 228 more columns]
